# Supplementary material for: Aerosol optical characteristics and their vertical distributions under enhanced haze pollution events: effect of the regional transport of different aerosol types over eastern China
Source: Copernicus journal article supplement (doi:10.5194/acp-2017-805), 2017-09-20
Supplement: Supplementary file 1 [file acp-2017-805-supplement.pdf]

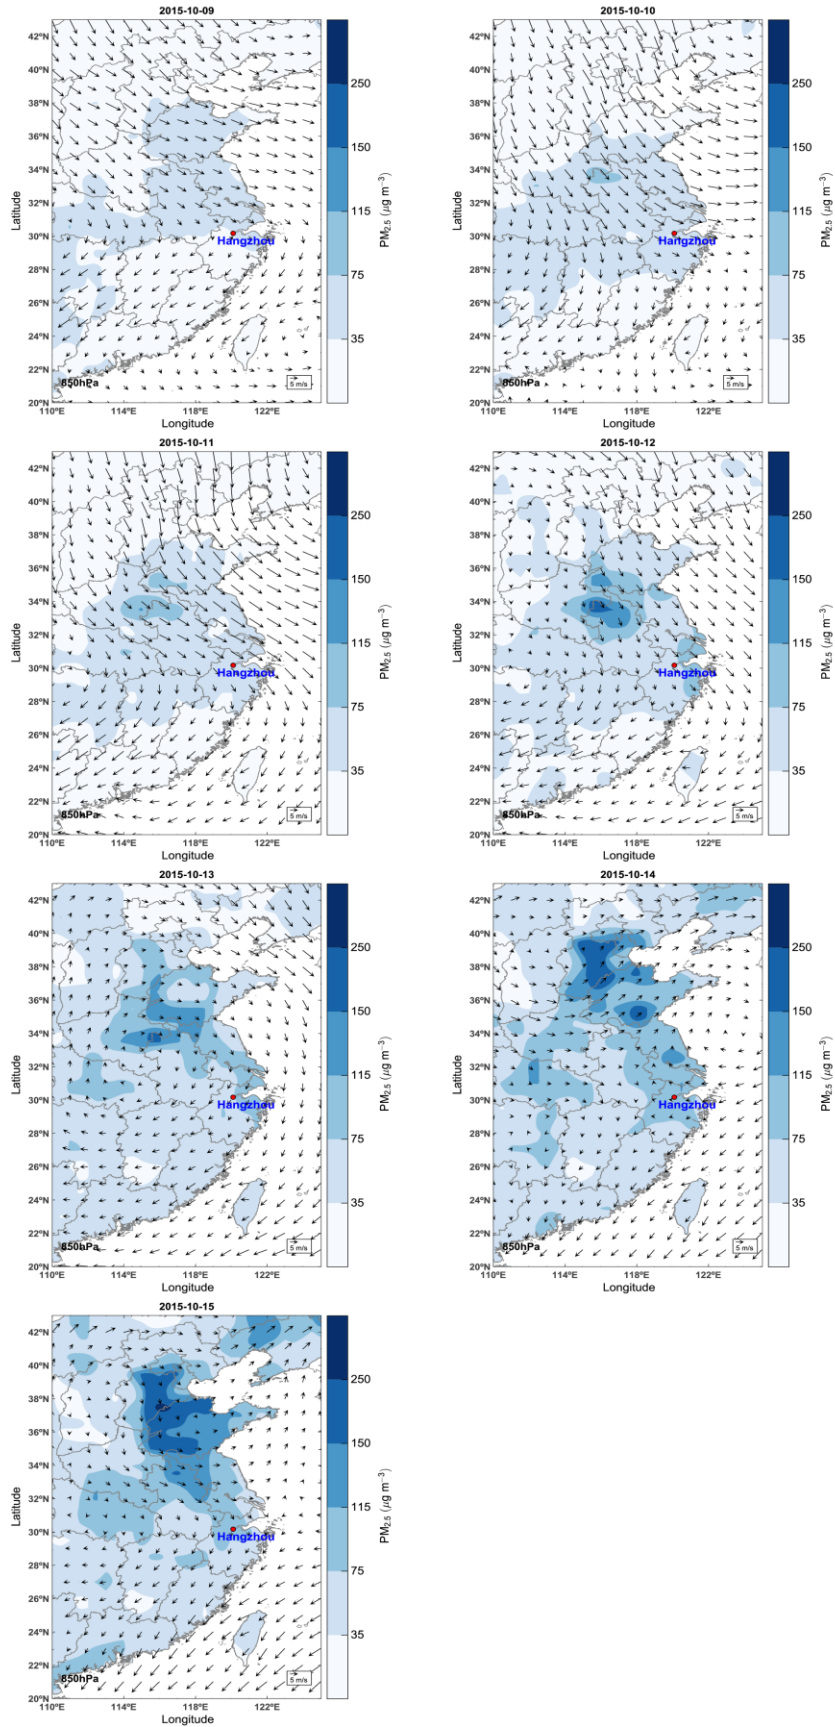

**Figure S1.** Daily averaged spatial distribution of  $PM_{2.5}$  mass concentration and the wind field at 850hPa from ECMWF over eastern China during 09-15 October, 2015.

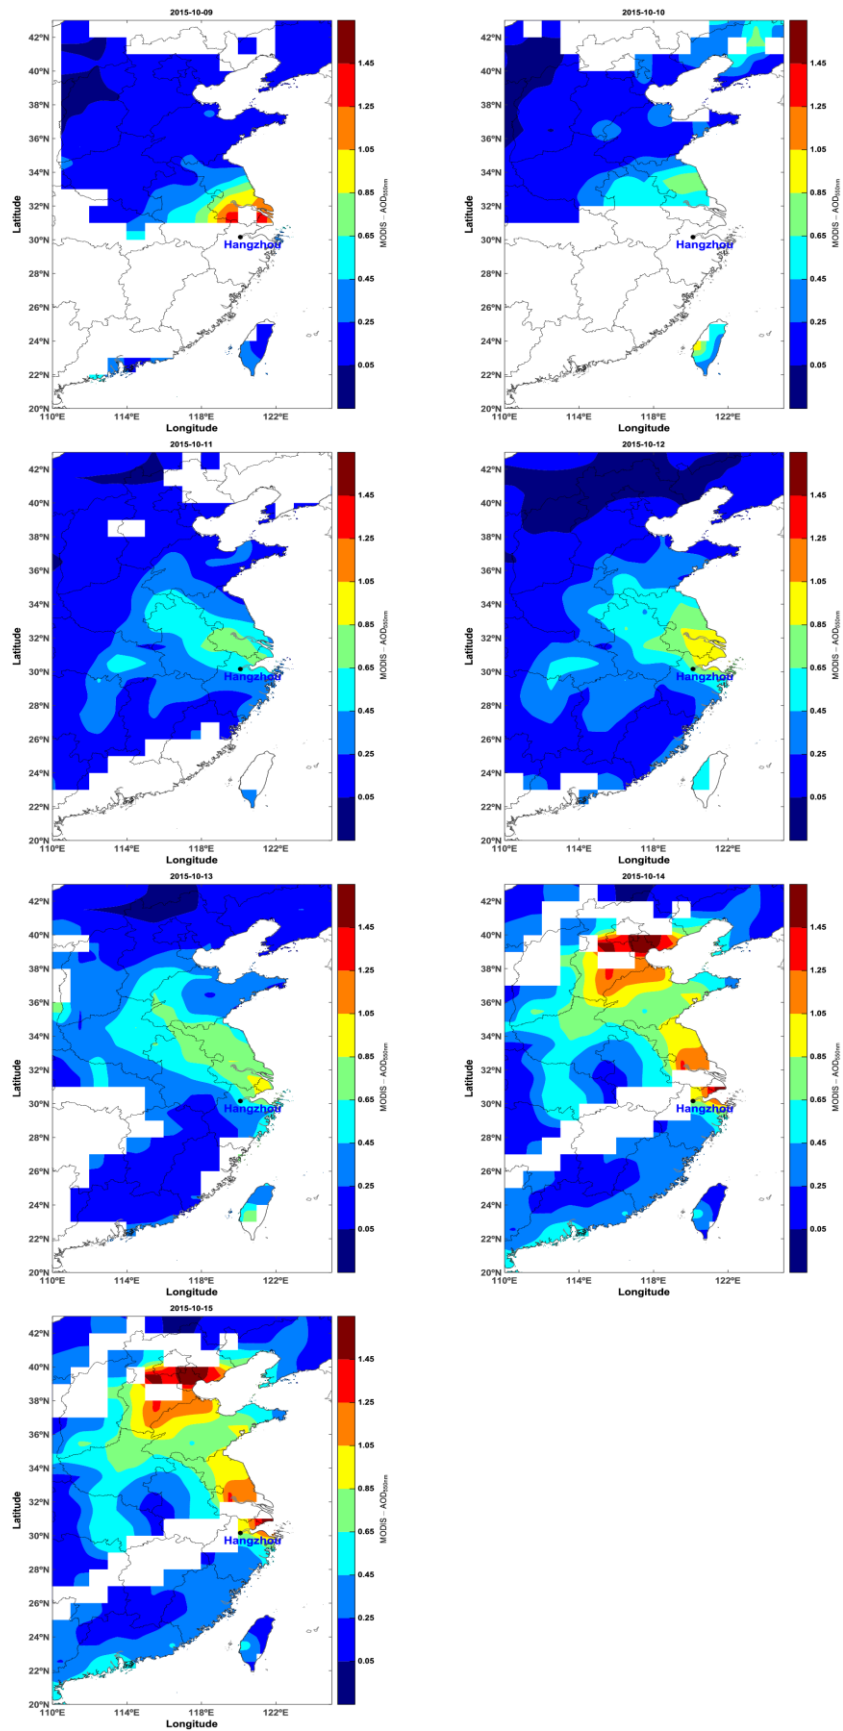

**Figure S2. Daily averaged spatial distribution of AOD from MODIS, over eastern China during 09-15 October, 2015.**

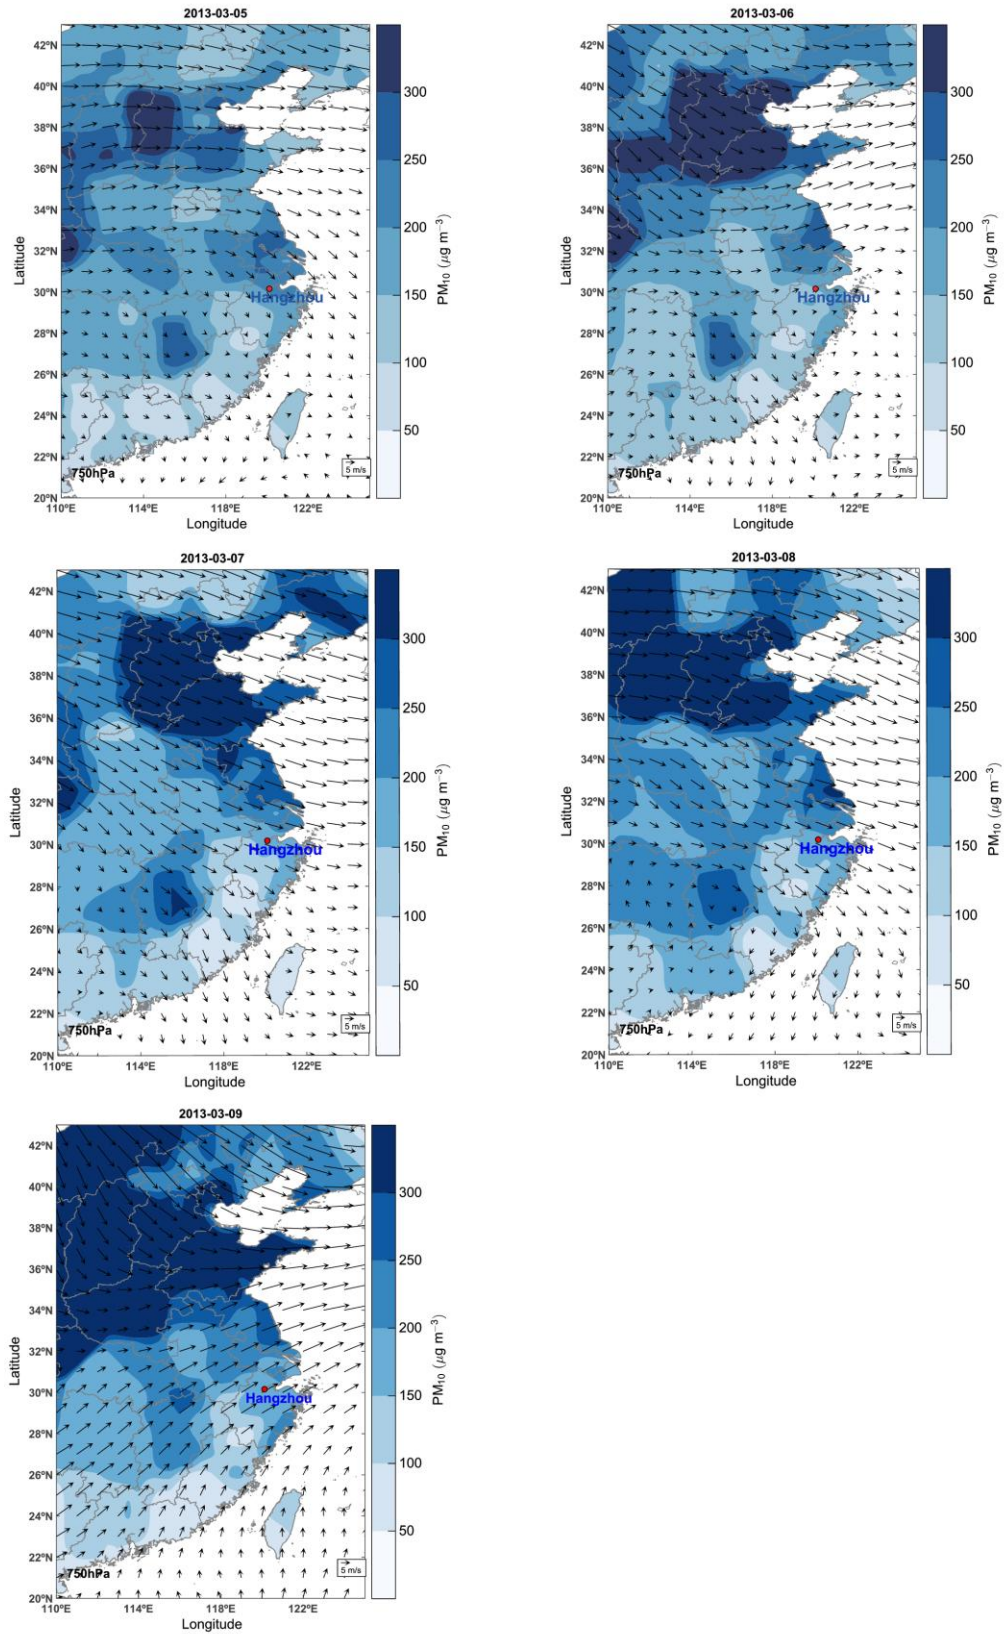

**Figure S3.** Daily averaged spatial distribution of PM<sub>10</sub> mass concentration and the wind field at 750hPa from ECMWF over eastern China, during 05-09 March, 2013.

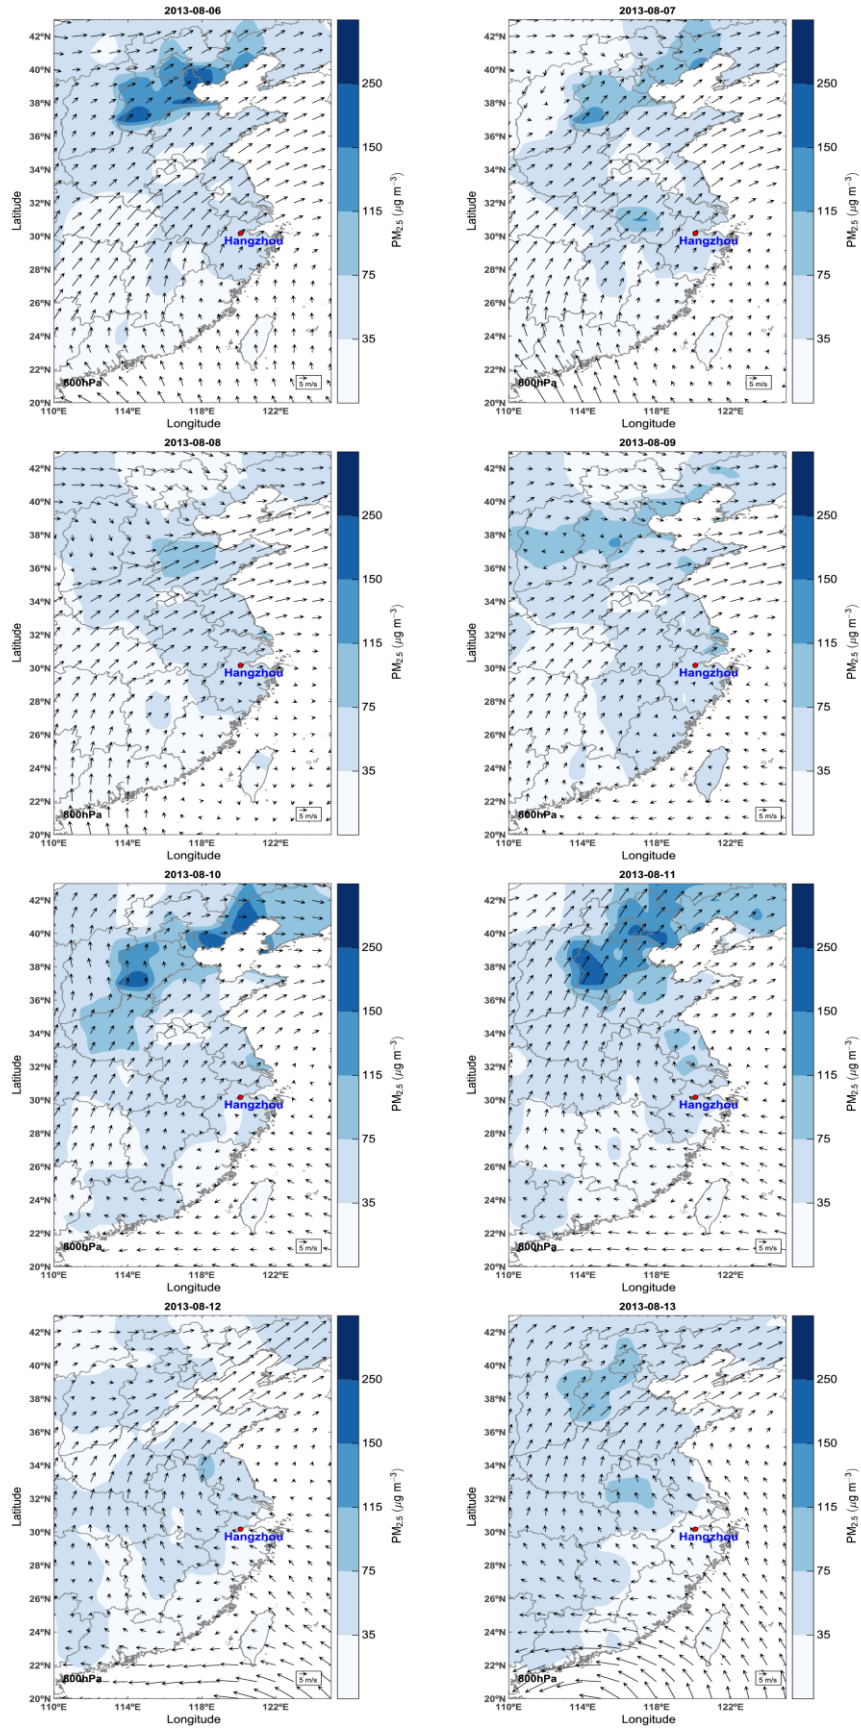

**Figure S4.** Daily averaged spatial distribution of PM<sub>2.5</sub> mass concentration and the wind field at 800hPa from ECMWF over eastern China, during 06-13 August, 2013.

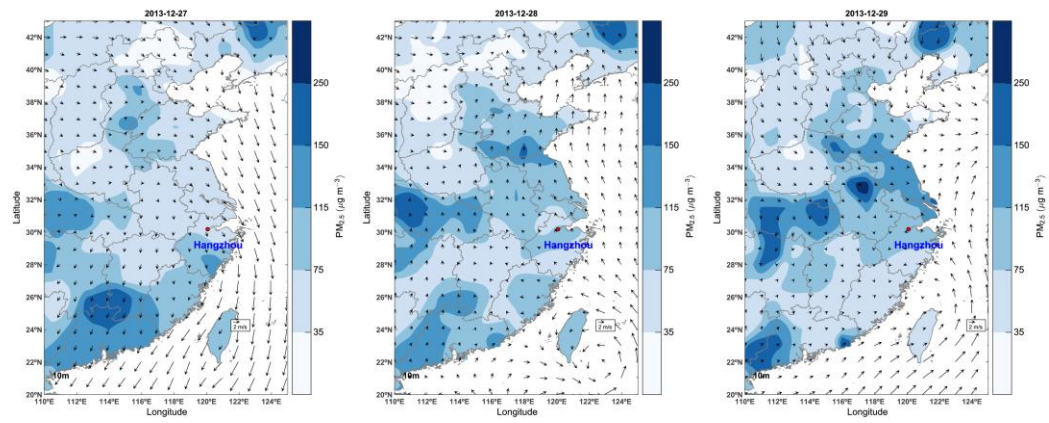

**Figure S5. Spatial distribution of PM<sub>2.5</sub> and the wind field at 10m from ECMWF over eastern China, during 27-29 December, 2013.**

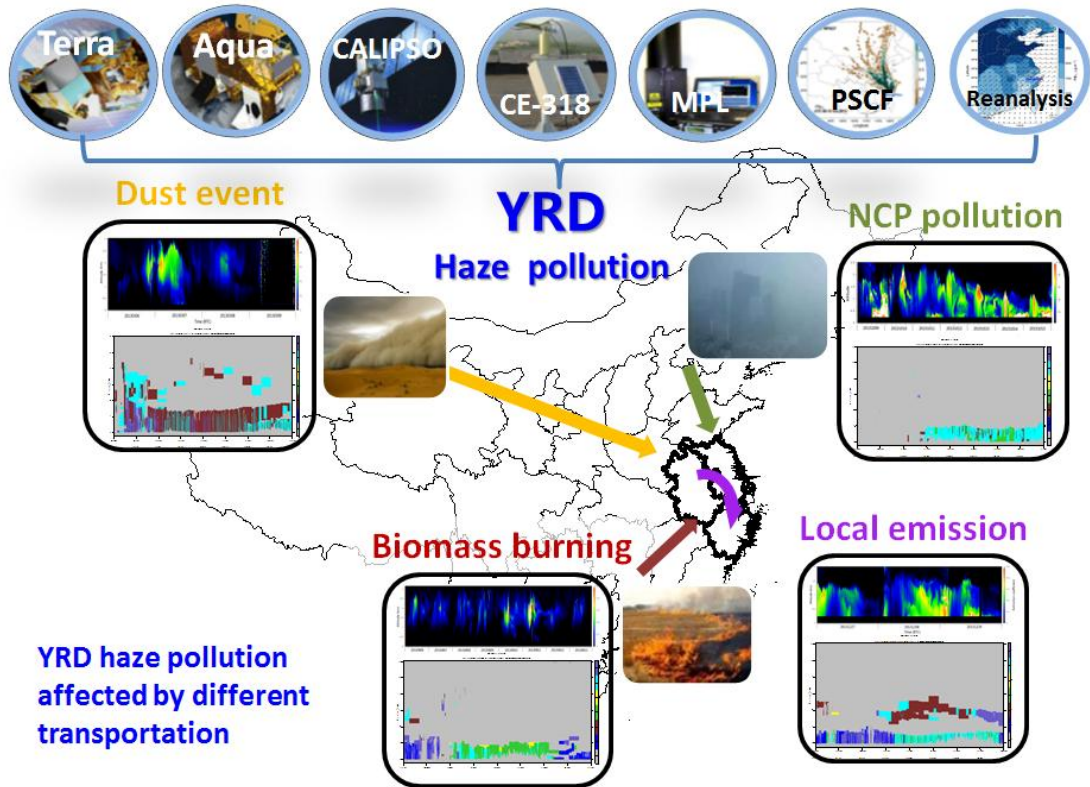

Figure S6. The sketch diagram of regional transport of different aerosol types over eastern China.
