# Supplementary material for: Aerosol optical characteristics and their vertical distributions under enhanced haze pollution events: effect of the regional transport of different aerosol types over eastern China
Source: Copernicus journal article supplement (doi:10.5194/acp-2017-805), 2017-09-20
Supplement: Supplementary file [file acp-2017-805-AC1-supplement.pdf]

# 1 Aerosol optical characteristics and their vertical distributions under 2 enhanced haze pollution events: effect of the regional transport of 3 different aerosol types over eastern China

4 Tianze Sun<sup>1</sup>, Huizheng Che<sup>1</sup>, Bing Qi<sup>2</sup>, Yaqiang Wang<sup>1</sup>, Yunsheng Dong<sup>3</sup>, Xiangao Xia<sup>4,5</sup>, Hong Wang<sup>1</sup>,  
5 Ke Gui<sup>1</sup>, Yu Zheng<sup>6</sup>, Hujia Zhao<sup>1</sup>, Qianli Ma<sup>7</sup>, Rongguang Du<sup>2</sup>, Xiaoye Zhang<sup>1</sup>

6 <sup>1</sup> State Key Laboratory of Severe Weather (LASW) and Institute of Atmospheric Composition, Chinese Academy of  
7 Meteorological Sciences, CMA, Beijing 100081, China

8 <sup>2</sup> Hangzhou Meteorological Bureau, Hangzhou 310051, China

9 <sup>3</sup> Key Laboratory of Environment Optics and Technology, Anhui Institute of Optics and Fine Mechanics, Chinese Academy  
10 of Science, Hefei 230031, China

11 <sup>4</sup> Laboratory for Middle Atmosphere and Global Environment Observation (LAGEO), Institute of Atmospheric Physics,  
12 Chinese Academy of Sciences, Beijing, 100029, China

13 <sup>5</sup> School of Geoscience University of Chinese Academy of Science, Beijing, 100049, China

14 <sup>6</sup> Collaborative Innovation Center on Forecast and Evaluation of Meteorological Disasters, Nanjing University of Information  
15 Science & Technology, Nanjing 210044, China

16 <sup>7</sup> Lin' an Regional Air Background Station, Lin' an 311307, China

17 *Correspondence to:* Huizheng Che (chehz@camsma.cn)

18 **Abstract.** The climatological variation of aerosol properties and the planetary boundary layer (PBL) during 2013–2015 over  
19 the Yangtze River Delta (YRD) region were investigated by employing ground-based Microwave Pulse Lidar (MPL) and  
20 CE-318 sun-photometer observations. Combining MODIS and CALIPSO satellite products, enhanced haze pollution events  
21 affected by different types of aerosol over the YRD region were analyzed through vertical structures, spatial distributions,  
22 backward trajectories, and the Potential Source Contribution Function (PSCF) model. The results show that aerosols in the  
23 YRD are dominated by fine-mode particles, except in March. The aerosol optical depth (AOD) in June and September is  
24 higher due to high single scattering albedo (SSA) from hygroscopic growth, but is lower in July and August due to wet  
25 deposition from precipitation. The PBL height (PBLH) is greater (means ranging from 1.23 to 1.84 km) and more variable in  
26 the warmer months of March to August, due to the stronger diurnal cycle and exchange of heat. Northern fine-mode  
27 pollutants are brought to the YRD at a height of 1.5 km. The SSA increases blocking the radiation to the surface, and cooling  
28 the surface, thereby weakening turbulence, lowering the PBL, and in turn accelerating the accumulation of pollutants,

29 creating a feedback to the cooling effect. Originated from the deserts in Xinjiang and Inner Mongolia, long-range transported  
30 dust masses are seen at heights of about 2 km over the YRD region with an  $SSA_{440nm}$  below 0.84, which heat air and upraise  
31 PBL, accelerating the diffusion of dust particles. Regional transport from biomass burning spots to the south of the YRD  
32 region bring mixed aerosol particles at a height below 1.5 km, resulting in an  $SSA_{440nm}$  below 0.89. During the winter, the  
33 accumulation of local emission layer is facilitated by stable weather condition, staying within the PBL even below 0.5 km.

## 34 1. Introduction

35 Aerosol particles influence Earth's radiation budget and play a significant role in global and regional climate change  
36 (Hansen et al., 1997;Che et al., 2015a;Zhang et al., 1998;Li et al., 2016). Despite numerous studies on aerosols, there is still  
37 much uncertainty surrounding aerosol optical properties in relation to current assessments and predictions of global climatic  
38 change (Ipcc, 2007;Stocker et al., 2013). The frequent occurrence of regional pollution demands worldwide attention  
39 because of the serious consequences it can have on visibility and human health (Wu et al., 2012;Sun et al., 2016;Chan and  
40 Yao, 2008;Bi et al., 2015).

41 The planetary boundary layer (PBL) is a critical component of Earth's climate system (Medeiros et al., 2005). The PBL  
42 is directly coupled with the land surface, and its height (PBLH) plays a significant role in determining the vertical  
43 distributions of aerosol particles (Deardorff, 1972). Based on Tang et al. (2016)'s research, the atmospheric mixing layer  
44 provide useful empirical information for improving meteorological and atmospheric chemistry models and the forecasting  
45 and warning of air pollution. The higher the accumulation of ambient aerosols, the less solar radiation reaches the surface,  
46 which will further restrict the development of the PBL, thus compounding the air pollution near the surface during prolonged  
47 stagnant weather conditions (Gao et al., 2015;Petäjä et al., 2016;Leng et al., 2015). Lidar measures the intensity of  
48 backscattered light as a function of distance from the instrument. The change in backscatter across the top of the boundary  
49 layer provides a convenient means of determining the PBLH. Long-term, continuous PBLHs are provided by Micro Pulse  
50 Lidar (MPL) observations to ascertain seasonal variations (Ku et al.;Lewis et al., 2013).

51 To analyze the spatiotemporal distribution of aerosol optical properties, multiple measurements from diverse angles

52 have been conducted by researchers worldwide. Satellite remote sensing and ground-based observations are two approved  
53 ways of monitoring the long-term variation of Earth's aerosol properties (Holben et al., 2001;Che et al., 2015a;Tao et al.,  
54 2014) used ground-based Cimel sun-photometers and found a decreasing trend in aerosol optical depth (AOD) from 2006 to  
55 2009, but an increase of  $\sim 0.03$  from 2009 to 2013 in China. Chauvigné et al. (2016) compared aerosol extinction with  
56 continuous high-altitude near-surface *in situ* measurements and low-altitude ground-based remote sensing atmospheric  
57 column measurements over a one-year period at the Puy de Dôme station, utilizing several *in situ* instruments such as the  
58 Cimel sun-photometer for the whole column, and lidar for vertical multi-altitude. Wu et al. (2017) used a variety of  
59 ground-based instruments and satellite sensors, including Moderate Resolution Imaging Spectroradiometer (MODIS),  
60 Atmospheric Infrared Sounder (AIRS), Cloud-Aerosol Lidar and Infrared Pathfinder Satellite Observation (CALIPSO), and  
61 Ozone Monitoring Instrument (OMI) products, to detail an integrated observation of an agricultural biomass burning episode  
62 in Nanjing, China. It is significant to estimate the leading pollution contributor using a combination of remote sensing,  
63 satellite data (Chen et al., 2017b). Along with the observations, trajectory models (e.g. HYSPLIT) for air mass tracking and  
64 potential source apportionment have been applied to analyze the origins of aerosols (Wang et al., 2006b).

65 The Yangtze River Delta (YRD) region is a key economic and cultural hub in China, with progressive development  
66 resulting in further particle emissions from industry and other anthropogenic activities. Many studies have been conducted  
67 on the aerosol optical properties and their variations in the cities of the YRD, such as Shanghai, Nanjing, Lin'an, and Taihu  
68 (Xia et al., 2007;Pan et al., 2010;He et al., 2012;Ding et al., 2013;Liu et al., 2015;Xing et al., 2017). Particularly in  
69 Hangzhou, the capital city of Zhejiang province, some researches have focused on determining the seasonal variation of  
70 aerosol properties, chemical compositions, and PM concentrations (Qi, 2016;Ming et al., 2017;Xiao et al., 2011), or  
71 single-case analyses on features of one pollution process (Chen et al., 2012;Fu et al., 2014;Li et al., 2015). However,  
72 research into the sources of pollutants in the YRD region is still needed to understand the mechanisms underlying haze  
73 pollution. Among these studies, there is a lack of long-term analysis of aerosols and their sources. In addition, single-case  
74 analysis is insufficiently representative for a site that experiences frequent haze occurrence. There is a lack of comprehensive  
75 studies in process analyzing from multiple aspects. In particular, studies in the YRD urban area have been based almost  
76 exclusively on data from *in situ* measurements, or on whole-column measurements that do not resolve the vertical

77 distribution. This can be obtained from satellite monitoring or ground-based lidar measurements. The retrieved time–height  
78 cross section of the extinction coefficient can reflect the vertical distribution and structure of the aerosol layer continuously,  
79 which will contribute to optimizing the satellite retrieval algorithm, and to verifying and improving the results from both  
80 satellites and models.

81 In this study, multiple data sources are analyzed to further understand the mechanisms underlying haze pollution  
82 affected by different aerosol transportation over the YRD region in eastern China. Hangzhou is selected as a representative  
83 site. The remainder of the paper is organized as follows: in section 2, the methods and data are presented; in section 3,  
84 seasonal aerosol optical properties, PM concentrations, and PBLHs from 2013 to 2015 are analyzed to illustrate the general  
85 aerosol characteristics over the urban area of the YRD; in section 4, four typical haze pollution episodes affected by different  
86 types of aerosol transported to the urban area of the YRD are analyzed with ground-based sun-photometer and MPL data for  
87 the obtaining optical properties and vertical distribution, satellite data from MODIS and CALIPSO for confirming the  
88 observed results, PM concentration data to build an overview of the spatial distribution of pollutants in eastern China, and  
89 reanalysis data for depicting the wind fields and calculating backward trajectories and potential source contributions; and in  
90 section 5, a brief summary is given.

## 91 **2. Methods and data**

### 92 **2.1 Ground-based sun-photometer and lidar measurements**

93 In this study, the aerosol optical properties were measured in Hangzhou (30°14'N, 120°10'E, 41.7 m above sea level).  
94 This site lies in the West Lake scenic area, which is a commercial and residential area in the southern part of the city (Fig. 1).  
95 The AOD at 440, 670, 870, and 1020 nm was measured from January 2013 to December 2015 using a CE-318  
96 sun-photometer with a 1.2° full field-of-view (Holben et al., 1998). The validated AOD data presented in this article were  
97 obtained using the ASTPwin software developed by Cimel Co. Ltd. (Che et al., 2013) for level 1.5 AOD (cloud-screened).  
98 Aerosol optical properties were processed using the method of Dubovik et al. (2000) and Dubovik and King (2000), based  
99 on the almucantar measurement data of the Cimel sun-photometer. The Cimel sky radiance measurements taken at 440, 670,

100 870, and 1020 nm, in conjunction with direct sun AOD data collected at same wavelengths, were used to retrieve volume  
101 aerosol size distributions ( $dV/d\ln(r)$  in the size range 0.05 to 15  $\mu\text{m}$ ), single scattering albedo (SSA) values, Ångström  
102 exponent (AE), absorption AOD (AAOD), and volume concentrations of fine- and coarse-mode aerosols (Eck et al.,  
103 2010;Che et al., 2014). Only SSA and AAOD results with  $\text{AOD}_{440\text{nm}} > 0.40$  were used due to the high uncertainties inherent  
104 in lower AOD values (Che et al., 2015b).

105 The ground-based lidar instrument used was the MPL installed at the Hangzhou National Reference Climatology  
106 Station. The MPL produced by Sigma Space Corporation is an elastic back-scattering lidar, equipped with a 532-nm  
107 wavelength laser launcher. In this study, aerosol measurements were obtained with a 30-m range resolution and a 30-s  
108 accumulation time, and a blind area of detection existed ranging from 200 to 300 m. The aerosol extinction coefficient  
109 profiles, PBLH, and AOD were retrieved during 2013–2015 using the algorithm of (Fernald, 1984), which considers the  
110 atmosphere to be comprised of aerosols and air molecules (Liu et al., 2016).

## 111 2.2 MODIS and CALIPSO data

112 The MODIS instrument operates on both the Terra and Aqua satellites. In this study, to illustrate the spatial distribution  
113 of AOD, we used the daily AOD combined dark target and deep blue data at 550 nm for land and ocean from MODIS Level  
114 2 Atmosphere Products, during 9–15 October 2015 (Levy et al., 2007a;Levy et al., 2007b). Global MODIS hot spots detected  
115 during 6–13 August 2013 in China were obtained from the Fire Information for Resource Management System for fire  
116 locations (<https://firms.modaps.eosdis.nasa.gov/>).

117 The products of CALIPSO were used for this study, and these are available at the NASA Langley Research Center  
118 (<https://www-calipso.larc.nasa.gov/>). The primary instrument carried on the CALIPSO satellite is the Cloud-Aerosol Lidar  
119 with Orthogonal Polarization (CALIOP). In this work, we selected the V4.10 CALIOP Level 2 data products to acquire the  
120 images of vertical feature masks and aerosol subtypes (Omar et al., 2009;Winker et al., 2009;Vaughan et al., 2004).

### 121 **2.3 Reanalysis data for the PBLH and wind field**

122 The reanalysis data for the PBLH and wind fields were downloaded from the European Centre for Medium-Range  
123 Weather Forecasts (ECMWF), ERA-Interim (<http://apps.ecmwf.int/datasets/>). The monthly-average PBLH values were from  
124 2013 to 2015, and the daily wind fields were analyzed at different pressure levels with a spatial resolution of  $0.5^{\circ} \times 0.5^{\circ}$ .

### 125 **2.4 Surface *in situ* PM<sub>2.5</sub> and PM<sub>10</sub> data**

126 In 2012, the China National Environmental Monitoring Center began to make hourly observations of PM<sub>2.5</sub>, PM<sub>10</sub>, and  
127 other atmospheric pollutants in 367 major cities in China (<http://106.37.208.233:20035/>). In this work, the hourly data were  
128 processed to obtain the daily and monthly PM<sub>2.5</sub> and PM<sub>10</sub> concentration results during 2013–2015.

### 129 **2.5 Backward trajectory, PSCF and CWT analysis**

130 Three-dimensional 72-h air mass backward trajectories at multiple altitudes over Hangzhou every 6 h (0000, 0600, 1200,  
131 and 1800 UTC) were calculated using the NCEP FNL (National Centers for Environmental Prediction Final Analyses)  
132 archive data. The software TrajStat (<http://www.meteothinker.com/products/trajstat.html>) (Ngan et al., 2015) was used. The  
133 cluster methods of air mass backward trajectories from Sirois and Bottenheim (1995) were applied to confirm the major  
134 transport pathways.

135 To determine the pollutants' source locations and prevailing transport pathways, backward trajectories combined with  
136 PM concentrations [referred to as the Potential Source Contribution Function (PSCF) model and Concentration Weighted  
137 Trajectory (CWT) model] were used. A weighting function was applied to better reflect the uncertainty in the values, and this  
138 is referred to as WPSCF and WCWT in each model, respectively (Polissar et al., 1999; Hsu et al., 2003; Xin, 2016; Seibert et  
139 al., 1994). The specifics of the two models' parameters and algorithms have been described in detail by Wang et al. (2006b).

### 140 3. Results and discussion

#### 141 3.1. Variation in PM<sub>2.5</sub> and PM<sub>10</sub> mass concentration

142 Figure 2a shows the monthly variation in mass concentrations of PM<sub>2.5</sub> and PM<sub>10</sub> and the proportion of PM<sub>2.5</sub> to PM<sub>10</sub>  
143 during 2013–2015 in Hangzhou. It can be seen that mass concentrations of PM<sub>10</sub> and PM<sub>2.5</sub> in the YRD region are distinctly  
144 higher in January (129.39 µg/m<sup>3</sup>), November (96.32 µg/m<sup>3</sup>), and December (119.16 µg/m<sup>3</sup>) than in other months, while the  
145 PM<sub>2.5</sub>:PM<sub>10</sub> ratio during these months plus February also exceeds other months, ranging from 76.1% to 86.6%. Meanwhile,  
146 the lowest concentrations occur in July and August, which can result from wet deposition due to the abundant precipitation at  
147 this time of year (Jacob and Winner, 2009). These results verify the findings of Ming et al. (2017), Cao et al. (2009), and  
148 Wang et al. (2006a), that the highest and lowest PM<sub>2.5</sub> mass concentrations occur respectively during the winter and summer  
149 in the YRD region. For the other months, concentrations of PM<sub>10</sub> are high but the PM<sub>2.5</sub> accounts for less than 65% during  
150 March to May.

#### 151 3.2 Variation in aerosol optical properties

152 Figure 2b depicts the monthly means of the AE between 440 nm and 870 nm, and the AOD at four different  
153 wavelengths (440, 670, 870, and 1020 nm) in Hangzhou during 2013–2015, retrieved from the CE-318 sun-photometer. The  
154 monthly variation trends of AOD means at the four wavelengths are consistent, and the values of AOD<sub>440nm</sub> are the highest  
155 among them. The averaged AOD<sub>440nm</sub> values during January to May are about 0.8, and the AOD values at the four  
156 wavelengths reach their maxima in June at  $1.20 \pm 0.55$ ,  $0.76 \pm 0.37$ ,  $0.54 \pm 0.25$ , and  $0.43 \pm 0.20$ , respectively. After June,  
157 AODs reduce to less than 0.8, and in August the mean values reach their minima at  $0.59 \pm 0.34$ ,  $0.32 \pm 0.21$ ,  $0.23 \pm 0.14$ , and  
158  $0.18 \pm 0.10$ , respectively. In September, the values increase again to  $1.07 \pm 0.54$ ,  $0.63 \pm 0.38$ ,  $0.43 \pm 0.26$ , and  $0.32 \pm$   
159  $0.20$ , respectively, after which the AOD<sub>440nm</sub> means decrease below 0.8 during October to December.

160 In general, AODs in June and September are relatively high, yet in July and August they are lower than in other months.  
161 The results of July and August agree with Qi (2016) that the lowest AOD appears in summer, with a mean value of  $0.72 \pm$

162 0.58 at 440 nm in Hangzhou. According to Che et al. (2014), the relatively low PM mass concentrations may result from the  
163 substantially increased precipitation in the YRD region in summer (including July and August) due to the summer monsoon,  
164 which can decrease the concentration of atmospheric aerosols through wet deposition. This pattern has also been observed in  
165 Taihu and Lin'an (Pan et al., 2010). Because the subtropical anticyclone begins to move north and precipitation decreases  
166 from the end of August to the beginning of September, the AOD increases in September. Nevertheless, the peak in the  
167 monthly AOD means in Pudong occurs in June, which may derive from the stable weather caused by the lack of strong  
168 winds (Duan and Mao, 2007).

169 The monthly mean AEs ( $AE_{440\text{nm}-870\text{nm}}$ ) vary almost inversely to the AOD, and are all greater than 0.8, which indicates  
170 that the AODs are dominated by fine particles in the YRD region during 2013–2015 (Qi, 2016; Eck et al., 2012). When  
171  $AE_{440\text{nm}-870\text{nm}}$  is greater than 0.8 at East Asian sites, fine-mode aerosols emitted from population centers in East Asia  
172 dominate the aerosol optical properties even on spring dust days, during which pollution aerosols are mixed with  
173 coarse-mode particles. Comparing the bars' heights in the figure, the minimum monthly averaged  $AE_{440\text{nm}-870\text{nm}}$  occurs in  
174 March ( $1.16 \pm 0.24$ ), and the maximum in September ( $1.41 \pm 0.25$ ). This shows the influence of long-distance dust transport  
175 from the desert districts located in northern and northwestern China (Zhang and Li, 2012; Gong et al., 2003), which can have  
176 an influence on the YRD region.

177 Figure 2c shows the monthly volume size distributions of aerosols during 2013–2015 in Hangzhou. In general, the size  
178 distributions show a bimodal logarithm normal structure: a fine mode with radius  $< 0.6 \mu\text{m}$  and coarse mode with radius  $>$   
179  $0.6 \mu\text{m}$  (Dubovik et al., 2002). Nevertheless, in June and September, the distribution appears tri-modal, indicating a  
180 tendency for hygroscopic growth in fine-mode particles in the YRD region (Pilat and Charlson, 1966). In June and  
181 September, the fine modes reach maximum peaks at a radius of  $0.34 \mu\text{m}$ , while other months' peaks occur at a radius of  $0.15$   
182  $\mu\text{m}$ . As for the coarse mode, March, April, November, and December peaks occur at a radius of  $2.24 \mu\text{m}$ , while the peak  
183 radius during the other months is larger than  $2.24 \mu\text{m}$ . Because of the dust transport, coarse modes dominate in March, while  
184 in July, August, and September the coarse mode only contributes a small fraction. Conversely, the fine particles play a  
185 leading role in the other months, particularly in June and September. This situation may arise due to the mixed influence of  
186 hygroscopic growth, coagulation growth, and different species of aerosols emitted from various sources (Li et al., 2007; Zhu



187 et al., 2014;Che et al., 2014). Hygroscopic properties of ambient particles in urban Hangzhou are mainly a function of their  
188 size and chemical composition (Zhang et al., 2011). Since the highest AOD values are seen in June (but not in July and  
189 August), it is suggested that the hygroscopic growth in the fine mode leads to enhanced scattering, which significantly raises  
190 the AOD values in the YRD region.

191 The SSA is defined as the ratio of the scattering coefficient to the extinction coefficient, and is one of the key  
192 parameters used in assessing the radiation effect on climate change (Jacobson, 2000). Highly absorbing particles, including  
193 urban-industrial aerosols, have a warming effect, while low absorbing particles such as dust can have a cooling effect  
194 (Dubovik et al., 2002). Figure 2d shows the monthly variation of SSA at the 440-, 670-, 870-, and 1020-nm wavelengths.  
195 From September to February, the SSAs at the four wavelengths are close and relatively high. However, over the warmer  
196 months of March to August, the values decrease and the difference between the wavelengths becomes greater, particularly in  
197 July and August with low SSA, which may imply that the low-SSA particles are more sensitive to the wavelength variability.  
198 The minimum SSAs occur in August at  $0.869 \pm 0.095$ ,  $0.839 \pm 0.114$ ,  $0.793 \pm 0.149$ , and  $0.762 \pm 0.169$ , respectively; the  
199 maximum is in September, with the highest value of  $0.963 \pm 0.033$  at 440 nm. As a result, the aerosols in the YRD region  
200 during August tend to be absorbing, but during September the hygroscopic aerosol particles become more capable of light  
201 scattering through condensation and evaporation of water vapor (Adachi et al., 2015), which may result from the variability  
202 of the aerosols' composition and sources in the ambient atmosphere. According to the studies by Qi (2016) and Xia et al.  
203 (2007), the absence of a heating period in southern China in winter causes higher SSA than in northern cities such as Beijing,  
204 where biomass burning can emit black and organic carbon. According to the results of monthly AOD and the volume size  
205 distribution presented in this article, the high level of AOD in September may be due to the strong scattering ability provided  
206 by the prominent hygroscopic growth.

### 207 **3.3 Variation in the PBLH measured by lidar**

208 In this study, by utilizing the backscatter signal at 532 nm with an MPL, the PBLHs from 2013 to 2015 at Hangzhou  
209 were retrieved at a 10-min temporal and 30-m spatial resolution. To verify the reliability of these PBLHs, we used the

210 monthly averaged reanalysis data of the PBL from ERA-Interim to obtain a linear fit with the PBLHs from MPL (after  
211 computing the monthly average). The Pearson's correlation coefficient between these two monthly averaged series is 0.88,  
212 which passes the significance test at the  $p = 0.1$  level. Despite the strong correlation between the reanalysis- and the  
213 MPL-derived PBLH, the values obtained from the reanalysis data are significantly lower than those from the MPL. It is  
214 suggested that improvements are needed in the reanalysis data.

215 Since the PBLHs retrieved from the MPL are reliable, we adopt them to examine the monthly variation characteristics  
216 in the YRD region during 2013–2015. Figure 3 shows the monthly averaged height of the PBL and its 5th and 95th  
217 percentile box plots during 2013–2015 in Hangzhou. Due to the blind detection area of the MPL, the minimum value is  
218 about 300 m above the surface. During the warmer months (including March to August), the monthly means of the PBLH are  
219 above 1 km, and the range between the 5th and 95th percentiles is greater than 1 km, varying from above 0.5 km to about 2  
220 km. Conversely, mean PBLHs in the colder months are almost below 1 km and the range between the 5th and 95th  
221 percentiles is half that in the warmer months, ranging from about 0.5 km to below 1.5 km. The wider range in the warmer  
222 months may result from a stronger diurnal cycle (Liu and Liang, 2010) and daily exchange of heat and mass in the PBL  
223 (Medeiros et al., 2005). These characteristics help to explain the higher *in situ* PM mass concentrations in the winter months  
224 than in summer discussed above.

### 225 **3.4 Case analysis of pollution sources**

226 For a further explanation of the monthly variation in aerosol optical properties, and to examine the variety of pollutant  
227 sources affecting the enhanced haze pollution events in the YRD region, four cases with different transportation categories  
228 are discussed here, combining ground-based observation, remote sensing, reanalysis, and satellite data, to build a  
229 comprehensive analysis (Fig. S6 in the supplementary material).

#### 230 **3.4.1 Pollutants transported from polluted areas in northern China**

231 A few episodes of pollutants transported from northern China were detected by the MPL, as illustrated in Fig. 4a, which  
232 shows the time–height cross section of extinction coefficients in Hangzhou. The aerosol vertical distributions were further

233 assessed by extracting profiles of aerosol extinction coefficient from the MPL on a daily basis during this period (Fig. 5). On  
234 the first day, 9 October 2015, the thin external aerosol layer is seen around 1 km during nighttime, when the maximum  
235 extinction coefficient is more than  $0.6 \text{ km}^{-1}$ , and this is separate from the lower local pollutants layer. During the following  
236 three days, the external aerosol masses are around 1 km at nighttime and above 1.5 km during the daytime, and appear to be  
237 multilayer in structure. Meanwhile, the daily averaged PBLH is around 1.2 km and 1.5 km on 11 October and 12 October  
238 respectively, sitting above the aerosol layer at nighttime and beneath it during the day (Fig. 6). With the PBL pushing down,  
239 the aerosol layer begins to descend from the afternoon of 12 October, continues to descend to below 1 km until 15 October,  
240 and then mixes downwards into the local emissions aerosol layer. Concurrently, the peak extinction coefficients vary from  
241  $0.2$  to  $0.5 \text{ km}^{-1}$ , reaching their maxima when the external and local pollutants mix together in the PBL. To verify the  
242 significance of the PBL in this process, the Pearson's correlation coefficient between the daily averaged PBLH from the  
243 MPL and the daily mass concentration of  $\text{PM}_{2.5}$  during 9–15 October was computed. The result appears negative, at  $-0.88$   
244 (passing the significance test at the  $p = 0.1$  level), which indicates that the descending PBL accelerates the accumulation of  
245 PM mass from the two aerosol layers in it.

246 Aerosol optical properties from the CE-318 retrieval data are exhibited in Fig. 6. According to the pattern of volume  
247 size distribution during 11–15 October 2015, the fine mode dominates, which can be referred to the volume of both modes as  
248 well, and the peak radius growth from  $0.11$  to  $0.15 \mu\text{m}$  is attributable to the hygroscopic growth, which may help strengthen  
249 the scattering ability of the particles (SSA is up to  $0.96$  at  $440 \text{ nm}$ ). The daily averaged AODs at  $440 \text{ nm}$  are all above  $0.65$   
250 during this process. On 15 October, the AOD is close to  $1.00$  at  $440 \text{ nm}$  when the two aerosol layers mix. The SSAs at all  
251 four wavelengths continue to increase from 11 to 14 October, and decrease on 15 October. The values at  $440 \text{ nm}$  vary from  
252  $0.95$  to around  $0.97$ . The AAODs show a corresponding variability trend with AOD and the volume of the coarse mode,  
253 which dominates the absorbing features. The maximum AAOD at  $440 \text{ nm}$  is  $0.056$  on 12 October, and the minimum is  $0.026$   
254 on 14 October.

255 Due to the continuous aerosol-transport signals detected by the MPL during 9–15 October 2015, trajectories over this  
256 period were grouped into three clusters, as depicted in Fig. 7a-1. Cluster-1 contributes the maximum proportion of  $50.00\%$   
257 and comes from northern China, via Hebei, western Shangdong and Jiangsu province, travelling southwards to the YRD

258 region. This cluster relates to the highest PM<sub>2.5</sub> concentration ( $81.05 \pm 28.18 \mu\text{g}/\text{m}^3$ ). Cluster-2 travels on the lowest and  
259 fastest stemming from north of Anhui province, accounts for 30.95%, and correlates with the PM<sub>2.5</sub> concentration of  $74.45 \pm$   
260  $30.17 \mu\text{g}/\text{m}^3$ . The highest air mass trajectories associated with cluster-3 account for 19.05% and originate from the eastern  
261 edge of Xinjiang at an altitude above 5000 m, also passing through Henan and Anhui province to Hangzhou.

262 The WPSCF reveals the spatial distribution of the probabilities of the potential PM<sub>2.5</sub> sources obtained by the HYSPLIT  
263 model and PM<sub>2.5</sub> concentrations. As shown in Fig. 7a-2, the most likely source areas with WPSCF values for PM<sub>2.5</sub> cover  
264 most of Henan, Anhui, Jiangsu, and Shangdong provinces, in which the WPSCF values are over 0.8. Figure 7a-3 shows the  
265 spatial distribution of the WCWT value, which provides information regarding the relative contribution of source regions  
266 potentially affecting PM<sub>2.5</sub> ( $> 35 \mu\text{g}/\text{m}^3$ ) in Hangzhou, similar to the WPSCF pattern. The northern part of Henan and the  
267 western Shangdong region (including the south of the Beijing–Tianjin districts), with rather high WCWT values ( $> 75 \mu\text{g}$   
268  $\text{m}^{-3}$ ), is recognized as the area contributing the most PM<sub>2.5</sub>. Combining the daily spatial distribution of PM<sub>2.5</sub> concentrations  
269 with AOD from MODIS retrieval data over eastern China (Figs. S1–S2 in the supplement), districts where the air mass  
270 trajectories pass intensively can be seen to have relatively high pollution levels. These include Henan, Hebei, Anhui, and  
271 Jiangsu provinces, situated in the North China Plain, which has been recognized as another center of high PM<sub>2.5</sub>  
272 concentrations (Zhang et al., 2012; Zhang et al., 2013). Besides, the pollution scope from north to the YRD region is wider  
273 and more serious day by day.

274 Furthermore, daily wind fields at 850 hPa (height of about 1.5 km, at which the transport is detected by the MPL) from  
275 ECMWF (Fig. S1 in the supplementary material) verify the northwest wind prevailing over eastern China during this case,  
276 which brought the pollutants from northern China to the YRD region. The wind speed gradually declines, benefiting the  
277 formation of stable conditions during the last few days. Note that CALIPSO’s acquisition of the aerosol vertical distribution  
278 on 14 October is consistent with the above results that an aerosol layer under 2 km exists over Hangzhou and the areas  
279 further north (where intensive trajectories passed over), and is identified as “polluted continental” or “polluted dust” (Fig.  
280 8a). Under certain circumstances, however, smoke aerosols can be misidentified as “polluted dust” aerosols (Xia et al.,  
281 2013).

282 Although a dry, clean northwestern airstream prevails in eastern China during winter (Tao et al., 2012), northern winds

283 near the surface may not be strong enough to blow the pollutants away from eastern China, but transport the particle  
284 pollutants to the central part of the North China Plain. The continuing northwesterly winds blow particle pollutants to the  
285 YRD region (Li et al., 2014;Ming et al., 2017). A similar transport mechanism occurs in this case during 9–15 October 2015.  
286 Northerly pollutant transport at 850 hPa primarily results in an increase in PM<sub>2.5</sub> mass concentration, which is facilitated by  
287 the occurrence of the descending external aerosol layers, pushed down by the PBL. Pollutants from the North China Plain  
288 are dominated by fine particles, which tend towards hygroscopic growth with adequate requisite moisture in the YRD region,  
289 increasing the SSA over Hangzhou. As a result, the increasing scattering aerosols transported from haze areas of North China  
290 block the solar radiation to the surface, creating a cooling effect. If that is the case, turbulence will correspondingly weaken,  
291 and the PBLH will decrease, facilitating the accumulation of pollutants at lower heights. The accumulation of air pollutants  
292 can then intensify the scattering ability, forming a positive feedback mechanism.

### 293 3.4.2 Pollutants transported from desert areas

294 Dust events in spring contribute to high AODs, particularly in northern and eastern China (Che et al., 2015b). They are  
295 transported over long distances and their influence can be identified on regional even global scales (Chin et al., 2006;Uno et  
296 al., 2009;Chen et al., 2017a;SiYu et al., 2017). For instance, Asian dusts are frequently observed in spring and result in air  
297 pollution in the downwind areas of East Asia (Kim et al., 2010;Sakai et al., 2002;Sakai et al., 2003;Liu et al., 2011;Li, 2015),  
298 such as the YRD region including Nanjing and Shanghai (Yong et al., 2015;Huang et al., 2013).

299 A series of transported aerosol masses from the northwestern desert area over the YRD region were monitored by the  
300 MPL and are seen in the time–height cross section of extinction coefficients at 532 nm during 5–9 March 2013 in Fig. 4b.  
301 Throughout this period, the volume size distributions and particle volumes are strongly dominated by the coarse mode (Fig.  
302 10). The peak radius of the fine mode is around 0.11  $\mu\text{m}$ , and 1.3  $\mu\text{m}$  for the coarse mode. The AOD on 7 March is around  
303 0.88, when the transported aerosol layer is most intense, while the value on 6 March is just 0.47 at 440 nm. Early on 5 March,  
304 the intensive layer is detected at 1.5 km and the peak extinction coefficient is around 0.65  $\text{km}^{-1}$ , according to the profiles  
305 shown in Fig. 9. The SSAs retrieved from the CE-318 are 0.84, 0.91, 0.91 and 0.90 at 440, 670, 870 and 1020 nm,  
306 respectively, which are lower than those for the northern transported particles. The corresponding AAODs are 0.13, 0.05,

307 0.04 and 0.04, respectively, which are higher than the values during the northern transportation case. The particles in this  
308 case are more strongly absorbing than the type transported from the northern polluted areas discussed in the previous section.  
309 The transported mass weakens on the second day until night, when the aerosol layer lies between 1.0 and 2.5 km, with the  
310 peak coefficient above  $0.4 \text{ km}^{-1}$ . Correspondingly, the volumes of both modes decrease, and this is accompanied by a drop in  
311 SSA and AAOD to 0.79 and 0.1, respectively, at the 440 nm wavelength. During 7–8 March, a thickening of the external  
312 aerosol layer is accompanied by a substantial increase in the volume of coarse-mode particles, coinciding with an increased  
313 AAOD to 0.15 on 7 March and 0.13 on 8 March, at 440 nm. The peak extinction is about  $0.2 \text{ km}^{-1}$  above a height of 2 km.  
314 On the last day of this case, no external aerosol layer is detected by the MPL (the noisy signals shown in the profiles in Fig. 9  
315 may result from an instrumental malfunction), and the absorption weakens due to the reduced volume. Note that the SSAs  
316 show little change during the last three days, which implies that SSA may not be sensitive to the variation of particles in the  
317 dominant coarse mode. Meanwhile, the PBLH above the aerosol layer varies from 2.0 km to about 3 km continuously in this  
318 case, dissipating the transported dust particles and causing the peak extinction coefficients to decrease each day.

319 From the CALIPSO L2 retrieval results of vertical feature mask and aerosol subtypes (illustrated in Fig. 8b), a 3-km  
320 thick aerosol layer can be seen on 5 March 2015 in the northwestern upwind areas of the YRD, with a mixture of “dust” and  
321 “polluted dust”. After this, a thin external layer is detected.

322 Assuming that the extraneous aerosol layer was dust, based on the *in situ* and satellite observations, 72-h backward  
323 trajectory analysis was applied to determine the source of the dust. Since the dust aerosol layer is most intense at 2 km, the  
324 start location of the trajectory calculation was set to be 2000 m. Figure 7b-1 shows three cluster trajectories changing with  
325 height. The air masses associated with cluster-1, accounting for 55%, originate from the Gurbantunggut Desert lying in  
326 northern Xinjiang, and move southeasterly over the Gobi Desert which is agreed to the results from Bi et al. (2017), and the  
327 Badain Duren Desert located in Inner Mongolia. This trajectory is similar to the dust pathway to Xi’an described by (Wang  
328 et al., 2006b). The air masses associated with cluster-2, accounting for 35%, follow parallel paths from the Kumtag Desert in  
329 western Xinjiang, and pass over the Loess Plateau. The cluster-3 stems from Guangxin province at an altitude below 3000 m,  
330 and does not pass over a desert area.

331 The number of trajectories in each cluster and the corresponding  $\text{PM}_{10}$  mean concentrations for all trajectories are

332 summarized in Table 1. Based on the mean  $PM_{10}$  concentrations in each cluster, clusters-1 and 2 take the most primary role  
333 in bringing dust to the YRD region. Combining the distribution of WPSCF and WCWT values, the sources most likely to  
334 affect the YRD are located in the deserts of northwestern China, termed the “Western High Dust Desert” (Zhang et al. (1998),  
335 which include the Gurbantunggut Desert, the Gobi Desert, and the Badain Duran Desert, covered by cluster-1. From the  
336 intensive trajectories’ pathways, Henan and Anhui provinces also appear to be highly likely source regions located upwind of  
337 the YRD, which just corresponds to the vertical feature mask from the CALIPSO L2 products that show a mixed layer of  
338 “dust” and “polluted dust” in Anhui province. The WCWT results make the potential sources explicit. The Gobi Desert, and  
339 Henan and Anhui provinces are prominent sources of dust transported to Hangzhou.

340 The daily spatial distributions of  $PM_{10}$  concentrations and wind fields at 750 hPa in eastern China during 5–9 March  
341 2013 are shown in Fig. S3 in the supplementary material. The *in situ* mean  $PM_{10}$  concentration on 5 March is between 200  
342 and 250  $\mu\text{g}/\text{m}^3$ , while for the remaining days it is between 150 and 200  $\mu\text{g}/\text{m}^3$  in Hangzhou. The wind fields at 750 hPa show  
343 northerly and northwesterly winds during 5–8 March 2013, consistent with the primary trajectories to Hangzhou at a height  
344 of 2 km. The second day, 6 March, shows the lowest wind speed, coinciding with minimal horizontal transport during that  
345 day, as can be seen in the time–height cross section of the MPL extinction coefficient (Fig. 4b). The wind speed over the next  
346 two days increases, as does the transport. On the last day, the wind direction turns southwesterly at 750 hPa, which may  
347 bring the clean air from the sea to Hangzhou. The wind direction on 9 March is consistent with the existence of cluster-3,  
348 which carries little  $PM_{10}$  mass and only accounts for 10% among the trajectories.

349 In spring, the long-range transport of dust aerosols from desert regions not only has an impact on northwestern cities  
350 such as Xi’an (Wang et al., 2006b), or cities in the north of eastern China such as Beijing, Xianghe, and Shenyang (Jinyuan  
351 et al., 2010; Zhang et al., 1998), but also on cities in the YRD region such as Nanjing, Shanghai (Zhang et al., 2016), and  
352 Hangzhou. When transported dust particles dominate in the ambient atmosphere over the YRD region, the aerosol optical  
353 properties show a relatively high level of absorptive features, much stronger than in aerosols transported from the north.  
354 These particles mostly come from moving air masses loaded with dust particles from desert regions located in northwestern  
355 China. During the days dust transport enhanced, absorptive dust particles increase AOD and AAOD over Hangzhou, and heat  
356 the atmosphere to facilitate the turbulence leading the PBL lifting in the same day, which will accelerate the diffusion in the

357 following days.

### 358 **3.4.3 Pollutants transported from biomass burning areas**

359 Since the lowest values of SSA occur in August, the aerosol particles over Hangzhou exhibit strong absorption  
360 characteristics in that month. Figure 4c illustrates the time–height cross section of extinction coefficient retrieved from the  
361 MPL during the transportation of biomass-burning emissions to Hangzhou, and shows little contribution from local  
362 emissions. In the first four days, the external aerosols are concentrated at 1.5 to 2 km and the peak extinctions are less than  
363  $0.2 \text{ km}^{-1}$ , even during the daytime (Fig. 11). In the meantime, the PBLH varies from 2.45 km to 2.93 km, above the  
364 transported aerosol layer. Over 10–11 August, the external fine particles are noticeably enhanced, with the PBLH decreasing  
365 to 2.30 km. Consequently, the layer develops downwards, to a height of around 1 km, which may imply a tendency towards  
366 sedimentation. Maximum extinctions exceed  $0.2 \text{ km}^{-1}$ , and even reach  $0.3 \text{ km}^{-1}$  during the daytime on 11 August. The  
367 transports tend to die down and deposit over 12–13 August, with a higher PBL, thinner aerosol layer, and lower coefficients  
368 (below  $0.1 \text{ km}^{-1}$ ). The whole process of this transportation is not as strong as the northern transport process. During 6–9  
369 August, AOD values (retrieved from the CE-318) are below 0.5. They increase to 0.75 when the maximum extinction occurs  
370 over 11–12 August, and decrease when diffusion and sedimentation contribute. Combined with other aerosol optical  
371 properties, fine-mode particles are remarkably dominant during the whole process in terms of the volume and its size  
372 distribution (Fig. 12). However, the mass concentration is far less than during the northern transported pollution of 11–15  
373 October 2015. In this case, the total volumes are below  $0.1 \mu\text{m}^3$  for most of the days, except for the two enhanced transport  
374 days in which the total volume exceeds  $0.12 \mu\text{m}^3$ . The SSAs keep increasing until a peak value of between 0.73 and 0.898 at  
375 440 nm before the last two days, which suggests that the increase in external fine particles enhances the scattering ability.  
376 The values are similar to the SSAs observed from biomass-burning emissions in the African savanna, Zambia, during 1995–  
377 2000 (Dubovik et al., 2002). The AAODs are almost above 0.09 at 440 nm during this period, which is higher than those  
378 seen in the northern transported pollution. It is suggested that the particles brought by these air masses are fine mode, with  
379 strong absorption characteristics, which is indicative of smoke aerosol.

380 To determine the pollution source, trajectories and primary clusters are depicted in Fig. 7c-1, with the



381 backward-trajectory start locations set to 1000 m, 1500 m, and 2000 m. Considering the significant absorptive ability of  
382 aerosol particles transported over Hangzhou, we apply the fire hotspot information (90% confidence) from MODIS  
383 Collection 6 and VIIRS 375 m to analyze the possible source of this type of particle. It is assumed that the external particles  
384 during these days were created from biomass burning, which is the major source of atmospheric light-absorbing organic  
385 carbon and black carbon aerosols, contributing around 42% of the global black carbon emissions (Bond et al., 2004; Bond et  
386 al., 2013; Cao et al., 2005). Combining the fire spots detected by MODIS with the trajectory analysis, the majority of  
387 trajectories (accounting for 69.79%), which are associated with cluster-1, travel northeasterly to the YRD region, passing  
388 over fire spots located in Guangdong, Fujian, Jiangxi, and Zhejiang provinces, with a mean PM<sub>2.5</sub> concentration of  $54.52 \pm$   
389  $16.63 \mu\text{g}/\text{m}^3$ . According to the study of (Chan, 2017), not only do the biomass burning emissions have local impacts, but they  
390 can also be transported intercontinentally and influence the atmospheric system on a global scale. The air masses associated  
391 with cluster-2 originate from the sea to the southeast, only passing one spot lying in southern Zhejiang with a mean PM<sub>2.5</sub>  
392 concentration of  $39.04 \pm 10.14 \mu\text{g}/\text{m}^3$ , bringing clean air from over the sea to Hangzhou during 12–13 August (Fig. S5 in the  
393 supplementary material).

394 With reference to the WPSCF and WCWT results, the locations of the potential sources are almost consistent with the  
395 regions where fire spots are detected or biomass burning occurs, including the eastern part of Guangdong and Jiangxi  
396 provinces, western Fujian, and most of Zhejiang. The occurrence of biomass burning in these areas has been studied  
397 previously (Wang and Zhang, 2008). With regard to the retrieval results of the vertical feature mask and aerosol subtype  
398 from CALIPSO on 5 August (Fig. 8c), the intensive aerosol layer exists below 2 km along the CALIPSO path southwest of  
399 Hangzhou. The aerosol types are mostly identified as “polluted continental” or “polluted dust” over and southwest of  
400 Hangzhou, which coincides with the backward trajectories carrying pollutants from the fire spots during 6–13 August 2013.  
401 As has been noted, the retrieval results from CALIPSO may misidentify the smoke aerosols as “polluted dust”, but for the  
402 majority of days during this case satellite retrieval data verify the results from CALIPSO.

403 The aerosol transported from the southern biomass-burning areas to Hangzhou shows a capacity for strong light  
404 absorption, and is dominated by the fine mode. The external aerosol layers observed in the vertical distribution of the  
405 extinction coefficient appear around 1–2 km, with the maximum value at  $0.3 \text{ km}^{-1}$ . The backward trajectory and potential

406 source analysis determine the likely sources. Satellite retrieval results (both MODIS and CALIPSO) verify that the  
407 transported aerosol originates from biomass-burning regions, and this is consistent with the aerosol optical properties  
408 retrieved from the CE-318 in Hangzhou. In addition, previous studies have shown that aerosol absorption depends on the  
409 mixing mechanism of soot with other aerosol components (Ackerman and Toon, 1981;Martins et al., 1998;Jacobson, 2001),  
410 so the situation that occurs during 6–13 August 2013 is not unique to the YRD region.

#### 411 **3.4.4 Pollutants emitted from local emissions**

412 While aerosols transported from the northern, southern or desert areas contribute much to the ambient atmospheric  
413 pollution in the YRD region, a high concentration of aerosols with diverse properties are also emitted locally (Chen et al.,  
414 2012;Zhuang et al., 2015;Liu et al., 2015).

415 Figure 4d shows a series of successive local emissions in the time–height cross section of the extinction coefficient  
416 obtained by the MPL, during 27–29 December 2013. The PBLH varies from 1.16 to 0.72 km during this period. It can be  
417 seen that the aerosol is composed of two layers, distributed below and above the PBL. An external aerosol layer can be seen  
418 at 1–1.5 km, while the layer caused by local emissions lies below 1 km, and even below 0.5 km, due to the stable PBL that  
419 exists over cold surfaces, particularly in the winter time (Medeiros et al., 2005). From the vertical profiles of the extinction  
420 coefficient in Fig. 13, 27 December 2013 sees the peak extinction of the local emissions layer, at around 0.1 and 0.15  $\text{km}^{-1}$  in  
421 the nighttime and daytime, respectively. The two separated layers mix downwards on the second day, so that the profiles  
422 barely show the separation between them, and the maximum extinction coefficient reaches 0.2  $\text{km}^{-1}$  below 0.5 km. On 29  
423 December, an intensification is seen both in aerosols transported at higher altitudes and in those emitted locally, and the peak  
424 coefficient for the local emissions layer is close to 0.4  $\text{km}^{-1}$  during the daytime and 0.2  $\text{km}^{-1}$  at night.

425 The AODs retrieved from CE-318 vary from 0.4 to 0.55, according to the results presented in Fig. 14. The volume size  
426 distribution during these three days shows a strong bimodal pattern, with the peak volumes at radii of 0.11  $\mu\text{m}$  and 2.94  $\mu\text{m}$   
427 for fine and coarse modes, respectively. Coarse particles noticeably dominate on 27 December, with an SSA of 0.89 at 440  
428 nm—lower than the value at other wavelengths. Meanwhile, satellite retrieval results of vertical feature mask and aerosol  
429 subtype from CALIPSO (Fig. 8d) verify the dominance of the coarse mode on 27 December. The L2 products confirm the

430 existence of an aerosol layer below 2 km, and identify it as mixed “polluted dust” and “polluted continental” over the YRD  
431 region. Furthermore, another layer identified as “dust” exists between the heights of 3-5 km (beyond the detection range of  
432 the MPL), composed of high-volume coarse mode particles, which may have an influence on the lower “polluted dust” layer.  
433 Over the next two days, the volume of the two modes become more balanced due to enhanced transport and emissions, and  
434 the SSAs at 440 nm show an inverse relationship to the values at other wavelengths. On 29 December, the lowest value of  
435 SSA (440 nm), at 0.88, and the highest value of AAOD (440 nm), at 0.073, is seen. The maximum SSA value in this case is  
436 higher than the peak SSA observed when desert transport occurs, but lower than the peak value seen with the strong  
437 biomass-burning transport. The aerosol optical properties of mixed fine- and coarse-mode particles are different from when  
438 one mode dominates.

439 With reference to the spatial distribution of PM<sub>2.5</sub> mass concentration and the wind field at 10 m from the surface (Fig.  
440 S5 in the supplementary material), the enhanced emissions seen in the extinction coincide with an increase in the *in situ*  
441 observed PM concentration during 28–29 December. The wind is low within the PBL due to the weakening of atmospheric  
442 circulation in northern China during winter (Tao et al., 2016). Consequently, the low wind speed at the surface contributes to  
443 the accumulation of aerosol particles, resulting in an increase in pollutant concentrations over these days.

444 Pollutants emitted locally stay below 0.5 km during 27–29 December 2013 in the YRD region. Facilitated by the low  
445 wind speed at the surface and the downward transport of external dust aerosols, aerosol optical properties show weaker  
446 absorption than the strong biomass-burning aerosol, and weaker scattering than transported dust aerosols.

#### 447 4. Conclusion

448 Based on long-term ground-based lidar and sunphotometer observations, variations in monthly averaged aerosol  
449 properties and PBLHs during 2013–2015 in the YRD region are presented and discussed. Combining satellite remote sensing  
450 data from CALIPSO and MODIS, backward trajectories, and PSCF and CWT analyses, four typical transportation  
451 mechanisms are analyzed under enhanced haze pollution events in the YRD region.

452 For the long-term monthly variation of aerosol optical properties in the YRD region, it is found that fine and scattering

453 particles dominate, except in March. The  $PM_{2.5}:PM_{10}$  ratio is high,  $AE_{440nm-870nm}$  is above 0.8, and SSA exceeds 0.85 during  
454 most months. Due to the low-altitude and stable PBL in the colder months (from September to February), PM mass  
455 concentrations in January, November, and December are high. Conversely, the lower PM concentrations occur during the  
456 warmer months (from March to August), partly due to a higher PBL attributed to a stronger diurnal cycle, but also due to  
457 higher precipitation in July and August. The AOD is generally high, implying severe aerosol loading in the YRD. As for the  
458 mixed type of aerosol in the YRD, the volume size distributions show a bimodal logarithmic normal structure, except in June  
459 and September, when it appears tri-modal due to hygroscopic growth. The highest SSA is also seen during these months.

460 During northern aerosol transportation, particles from polluted areas in North China are seen at a height of about 1–1.5  
461 km, within the PBL, and are dominated by the fine mode, with  $AOD_{440nm}$  above 0.65 and  $SSA_{440nm}$  varying from 0.95 to 0.97.  
462 A rising SSA indicates an increase in transported scattering particles, which decrease the radiation to the surface and cool the  
463 surface. The weakening turbulence and the declining PBL lowers the aerosol layer and pollutants accumulate at lower  
464 altitudes, thereby concentrating the scattering particles and forming a positive feedback mechanism.

465 Although dust transport to the YRD is seasonal and infrequent, it does make a difference to the YRD's aerosol loading.  
466 Dust air masses around 2 km are transported from the northwestern desert regions including the Gurbantunggut Desert, the  
467 Gobi Desert, and the Badain Duran Desert, and diffuses vertically with the lifting PBL. A significant increase in the coarse  
468 mode at high altitudes brings about high concentrations of  $PM_{10}$  and higher  $AAOD_{440nm}$ , illustrating the stronger absorptive  
469 feature of transported dust compared to the northern pollutants transported over the YRD region. And the transported  
470 absorptive dust particles heat the atmosphere, lifting PBL over YRD region to accelerate the diffusion in the PBL.

471 Biomass-burning pollutants also bring about a seasonal contribution to the aerosol loadings over the YRD region. In the  
472 case of biomass-burning transportation, backward trajectories are consistent with the fire spots located in Guangdong, Fujian,  
473 Jiangxi, and Zhejiang provinces south of the YRD, bringing absorptive fine particles to heights of about 1.5 km over that  
474 region. The SSAs on most days are lower than 0.8 (except one day when the maximum  $SSA_{440nm}$  is 0.898), indicating that  
475 the biomass-burning pollutants transported from the southwest to the YRD can strengthen the absorptive ability in the  
476 ambient atmosphere over the YRD.

477 The accumulation of locally emitted pollutants is facilitated by the low wind speed at the surface (10 m). During the

478 locally emitted aerosol case, the local aerosol layer appears below 1 km, and the low surface wind provides no external  
479 transport. The mixture of locally emitted aerosols and dust particles transported downwards shows weaker absorption than  
480 the biomass-burning products, and weaker scattering than the transported dust aerosols, with the  $SSA_{440nm}$  varying from 0.86  
481 to 0.91.

482 The haze pollution events that occur in the YRD region are not only affected by local emissions, but can also be  
483 contributed to by regional transport, including pollutants from North China, dust aerosols from the northwestern deserts, and  
484 strong absorptive particles from southern biomass-burning areas. Therefore, air quality control should focus not only on local  
485 emissions reduction, but also on regional emissions.

## 486 **Acknowledgments**

487 This work was supported by grant from National Key R & D Program Pilot Projects of China (2016YFA0601901),  
488 National Natural Science Foundation of China (41590874&41375153), Natural Science Foundation of Zhejiang Province  
489 (LY16010006), the CAMS Basis Research Project (2016Z001 & 2014R17), the Climate Change Special Fund of CMA  
490 (CCSF201504), CAMS Basic Research Project (2014R17), the Special Project of Doctoral Research supported by Liaoning  
491 Provincial Meteorological Bureau (D201501), Hangzhou Science and Technology Innovative project (20150533B17).

## 492 **References**

- 493 Ackerman, T. P., and Toon, O. B.: Absorption of visible radiation in atmosphere containing mixtures of absorbing and  
494 nonabsorbing particles, *Appl Opt*, 21, 3661-3667, 1981.
- 495 Adachi, K., Freney, E. J., and Buseck, P. R.: Shapes of internally mixed hygroscopic aerosol particles after deliquescence, and  
496 their effect on light scattering, *Geophysical Research Letters*, 38, 142-154, 2015.
- 497 Bi, J., Huang, J., Hu, Z., Holben, B. N., and Guo, Z.: Investigating the aerosol optical and radiative characteristics of heavy  
498 haze episodes in Beijing during January of 2013, *Journal of Geophysical Research Atmospheres*, 119, 9884-9900, 2015.
- 499 Bi, J., Huang, J., Shi, J., Hu, Z., Zhou, T., Zhang, G., Huang, Z., Wang, X., and Jin, H.: Measurement of scattering and  
500 absorption properties of dust aerosol in a Gobi farmland region of northwest China — a potential anthropogenic  
501 influence, *Atmospheric Chemistry & Physics*, 1-41, 2017.

502 Bond, T. C., Streets, D. G., Yarber, K. F., Nelson, S. M., Woo, J. H., and Klimont, Z.: A technology - based global inventory of  
503 black and organic carbon emissions from combustion, *Journal of Geophysical Research Atmospheres*, 109, 1149-1165,  
504 2004.

505 Bond, T. C., Doherty, S. J., Fahey, D. W., Forster, P. M., Berntsen, T., Deangelo, B. J., Flanner, M. G., Ghan, S., Kärcher, B., and  
506 Koch, D.: Bounding the role of black carbon in the climate system: A scientific assessment, *Journal of Geophysical  
507 Research: Atmospheres*, 118, 5380-5552, 2013.

508 Cao, J., Shen, Z., Chow, J. C., Qi, G., and Watson, J. G.: Seasonal variations and sources of mass and chemical composition for  
509 PM 10 aerosol in Hangzhou, China, *Particuology*, 7, 161-168, 2009.

510 Cao, J. J., Wu, F., Chow, J. C., and Lee, S. C.: Characterization and source apportionment of atmospheric organic and  
511 elemental carbon during fall and winter of 2003 in Xi'an, China, *Atmospheric Chemistry & Physics*, 5, 3127-3137, 2005.

512 Chan, C. K., and Yao, X.: Air pollution in mega cities in China, *Atmospheric Environment*, 42, 1-42, 2008.

513 Chan, K. L.: Biomass burning sources and their contributions to the local air quality in Hong Kong, *Science of the Total  
514 Environment*, 596-597, 212, 2017.

515 Chauvigné, A., Sellegri, K., Hervo, M., Montoux, N., Freville, P., and Goloub, P.: Comparison of the aerosol optical properties  
516 and size distribution retrieved by sun photometer with in situ measurements at midlatitude, 9, 4569-4585, 2016.

517 Che, H., Xia, X., Zhu, J., Li, Z., Dubovik, O., Holben, B., Goloub, P., Chen, H., Estelles, V., and Cuevasagulló, E.: Column aerosol  
518 optical properties and aerosol radiative forcing during a serious haze-fog month over North China Plain in 2013 based  
519 on ground-based sunphotometer measurements, *Atmospheric Chemistry & Physics*, 14, 2125-2138, 2014.

520 Che, H., Zhang, X. Y., Xia, X., Goloub, P., Holben, B., Zhao, H., Wang, Y., Zhang, X. C., Wang, H., and Blarel, L.: Ground-based  
521 aerosol climatology of China: aerosol optical depths from the China Aerosol Remote Sensing Network (CARSNET)  
522 2002-2013, *Atmospheric Chemistry & Physics*, 15, 7619-7652, 2015a.

523 Che, H., Zhao, H., Wu, Y., Xia, X., Zhu, J., Wang, H., Wang, Y., Sun, J., Yu, J., and Zhang, X.: Analyses of aerosol optical  
524 properties and direct radiative forcing over urban and industrial regions in Northeast China, *Meteorology and  
525 Atmospheric Physics*, 127, 345-354, 2015b.

526 Che, H. Z., Wang, Y. Q., Sun, J. Y., Zhang, X. C., Zhang, X. Y., and Guo, J. P.: Variation of Aerosol Optical Properties over the  
527 Taklimakan Desert in China, *Aerosol & Air Quality Research*, 13, 777-785, 2013.

528 Chen, J., Jiang, H., Wang, B., Xiao, Z., Jiang, Z., Zhou, G., and Yu, S.: Aerosol optical properties from sun photometric  
529 measurements in Hangzhou district, China, *International Journal of Remote Sensing*, 33, 2451-2461, 2012.

530 Chen, S., Huang, J., Qian, Y., Zhao, C., Kang, L., Yang, B., Wang, Y., Liu, Y., Yuan, T., and Wang, T.: An overview of mineral dust  
531 modeling over East Asia, *Journal of Meteorological Research*, 31, 633-653, 2017a.

532 Chen, Z., Cheng, L., Liu, W., Zhang, T., and Jin, X.: A synchronous observation of enhanced aerosol and NO<sub>2</sub> over Beijing,  
533 China, in winter 2015, *Science of the Total Environment*, 575, 429, 2017b.

534 Chin, M., Diehl, T., Ginoux, P., and Yu, H.: Intercontinental Transport of Aerosols: Implication for Regional Air Quality, AGU  
535 Spring Meeting, 2006.

536 Deardorff, J. W.: Parameterization of the Planetary Boundary layer for Use in General Circulation Models<sup>1</sup>, *Monthly  
537 Weather Review*, 100, 93, 1972.

538 Ding, A., Fu, C., Yang, X., Sun, J., Petäjä, T., Kerminen, V.-M., Wang, T., Xie, Y., Herrmann, E., and Zheng, L.: Intense

539 atmospheric pollution modifies weather: a case of mixed biomass burning with fossil fuel combustion pollution in  
540 eastern China, *Atmospheric chemistry and physics*, 13, 10545-10554, 2013.

541 Duan, J., and Mao, J.: Study on the Distribution and Variation Trends of Atmospheric Aerosol Optical Depth over the Yangtze  
542 River Delta in China, Springer Netherlands, 361-370 pp., 2007.

543 Dubovik, O., Smirnov, A., Holben, B. N., King, M. D., Kaufman, Y. J., Eck, T. F., and Slutsker, I.: Accuracy assessments of  
544 aerosol optical properties retrieved from Aerosol Robotic Network (AERONET) Sun and sky radiance measurements,  
545 *Journal of Geophysical Research Atmospheres*, 105, 9791-9806, 2000.

546 Dubovik, O., Holben, B., Eck, T. F., Smirnov, A., Kaufman, Y. J., King, M. D., Tanré, D., and Slutsker, I.: Variability of absorption  
547 and optical properties of key aerosol types observed in worldwide locations, *Journal of the atmospheric sciences*, 59,  
548 590-608, 2002.

549 Eck, T. F., Holben, B. N., Sinyuk, A., Pinker, R. T., Goloub, P., Chen, H., Chatenet, B., Li, Z., Singh, R. P., and Tripathi, S. N.:  
550 Climatological aspects of the optical properties of fine/coarse mode aerosol mixtures, *Journal of Geophysical Research*  
551 *Atmospheres*, 115, 19205, 2010.

552 Eck, T. F., Holben, B. N., Reid, J., Giles, D., Rivas, M., Singh, R. P., Tripathi, S., Bruegge, C., Platnick, S., and Arnold, G.: Fog -  
553 and cloud - induced aerosol modification observed by the Aerosol Robotic Network (AERONET), *Journal of*  
554 *Geophysical Research: Atmospheres*, 117, 2012.

555 Fernald, F. G.: Analysis of atmospheric lidar observations: some comments, *Applied Optics*, 23, 652, 1984.

556 Fu, X., Wang, S. X., Cheng, Z., Xing, J., Zhao, B., Wang, J. D., and Hao, J. M.: Source, transport and impacts of a heavy dust  
557 event in the Yangtze River Delta, China, in 2011, *Atmospheric Chemistry & Physics*, 14, 1239-1254, 2014.

558 Gao, Y., Zhang, M., Liu, Z., Wang, L., Wang, P., Xia, X., Tao, M., and Zhu, L.: Modeling the feedback between aerosol and  
559 meteorological variables in the atmospheric boundary layer during a severe fog-haze event over the North China Plain,  
560 *Atmospheric Chemistry & Physics*, 15, 1093-1130, 2015.

561 Gong, S., Zhang, X., Zhao, T., McKendry, I., Jaffe, D., and Lu, N.: Characterization of soil dust aerosol in China and its  
562 transport and distribution during 2001 ACE - Asia: 2. Model simulation and validation, *Journal of Geophysical Research:*  
563 *Atmospheres*, 108, 2003.

564 Hansen, J., Sato, M., and Ruedy, R.: Radiative forcing and climate response, *Journal of Geophysical Research*, 102,  
565 6831-6864, 1997.

566 He, Q., Li, C., Geng, F., Yang, H., Li, P., Li, T., Liu, D., and Pei, Z.: Aerosol optical properties retrieved from Sun photometer  
567 measurements over Shanghai, China, *Journal of Geophysical Research Atmospheres*, 117, 81-81, 2012.

568 Holben, B. N., Eck, T. F., Slutsker, I., Tanr, D., eacute, Buis, J. P., Setzer, A., Vermote, E., Reagan, J. A., Kaufman, Y. J., and  
569 Nakajima, T.: AERONET&mdash;A Federated Instrument Network and Data Archive for Aerosol Characterization,  
570 *Remote Sensing of Environment*, 66, 1–16, 1998.

571 Holben, B. N., Tanré, D., Smirnov, A., Eck, T. F., Slutsker, I., Abuhassan, N., Newcomb, W. W., Schafer, J. S., Chatenet, B., and  
572 Lavenu, F.: An emerging ground-based aerosol climatology: Aerosol optical depth from AERONET, *Journal of*  
573 *Geophysical Research Atmospheres*, 106, 12067–12097, 2001.

574 Hsu, Y. K., Holsen, T. M., and Hopke, P. K.: Comparison of hybrid receptor models to locate PCB sources in Chicago,  
575 *Atmospheric Environment*, 37, 545-562, 2003.

576 Huang, X. X., Wang, T. J., Jiang, F., Liao, J. B., Cai, Y. F., Yin, C. Q., Zhu, J. L., and Han, Y.: Studies on a Severe Dust Storm in East  
577 Asia and Its Impact on the Air Quality of Nanjing, China, *Aerosol & Air Quality Research*, 13, 179-193, 2013.

578 IPCC, I.: IPCC Fourth Assessment Report: climate change 2007, 1340-1356, 2007.

579 Jacob, D. J., and Winner, D. A.: Effect Of Climate Change On Air Quality, *Atmospheric Environment*, 43, 51-63, 2009.

580 Jacobson, M. Z.: A physically - based treatment of elemental carbon optics: Implications for global direct forcing of aerosols,  
581 *Geophysical Research Letters*, 27, 217-220, 2000.

582 Jacobson, M. Z.: Strong radiative heating due to the mixing state of black carbon in atmospheric aerosols, *Nature*, 409,  
583 695-697, 2001.

584 Jinyuan, Wupeng, WANG, Yuesi, Qingxian, Zhanqing, WANG, and Mingxing: Aerosol Optical Properties Affected by a Strong  
585 Dust Storm over Central and Northern China, *Advances in Atmospheric Sciences*, 27, 562-574, 2010.

586 Kim, S. W., Yoon, S. C., Kim, J., Kang, J. Y., and Sugimoto, N.: Asian dust event observed in Seoul, Korea, during 29-31 May  
587 2008: analysis of transport and vertical distribution of dust particles from lidar and surface measurements, *Science of  
588 the Total Environment*, 408, 1707-1718, 2010.

589 Ku, J. Y., Högrefe, C., Sistla, G., Chaw, S., Charles, L., and Gross, B.: Use of lidar backscatter to determine the PBL heights in  
590 New York City, NY.

591 Leng, C., Duan, J., Xu, C., Zhang, H., Zhang, Q., Wang, Y., Li, X., Kong, L., Tao, J., and Cheng, T.: Insights into a historic severe  
592 haze weather in Shanghai: synoptic situation, boundary layer and pollutants, *Atmospheric Chemistry & Physics*, 16,  
593 9221-9234, 2015.

594 Levy, R. C., Remer, L. A., and Dubovik, O.: Global aerosol optical models and lookup tables for the new MODIS aerosol  
595 retrieval over land, 2007a.

596 Levy, R. C., Remer, L. A., Mattoo, S., Vermote, E. F., and Kaufman, Y. J.: Second - generation operational algorithm: Retrieval  
597 of aerosol properties over land from inversion of Moderate Resolution Imaging Spectroradiometer spectral reflectance,  
598 *Journal of Geophysical Research Atmospheres*, 112, 319-321, 2007b.

599 Lewis, J. R., Welton, E. J., Molod, A. M., and Joseph, E.: Improved boundary layer depth retrievals from MPLNET, *Journal of  
600 Geophysical Research-atmospheres*, 118, 9870-9879, 2013.

601 Li, L., Huang, C., Huang, H. Y., Wang, Y. J., Yan, R. S., Zhang, G. F., Zhou, M., Lou, S. R., Tao, S. K., and Wang, H. L.: An  
602 integrated process rate analysis of a regional fine particulate matter episode over Yangtze River Delta in 2010,  
603 *Atmospheric Environment*, 91, 60-70, 2014.

604 Li, L., An, J. Y., Zhou, M., Yan, R. S., Huang, C., Lu, Q., Lin, L., Wang, Y. J., Tao, S. K., and Qiao, L. P.: Source apportionment of  
605 fine particles and its chemical components over the Yangtze River Delta, China during a heavy haze pollution episode,  
606 *Atmospheric Environment*, 123, 415-429, 2015.

607 Li, R.: Multi-Satellite Observation of an Intense Dust Event over Southwestern China, *Aerosol & Air Quality Research*, 15,  
608 263-270, 2015.

609 Li, Z., Xia, X., Cribb, M., Mi, W., Holben, B., Wang, P., Chen, H., Tsay, S. C., Eck, T. F., and Zhao, F.: Aerosol optical properties  
610 and their radiative effects in northern China, *Journal of Geophysical Research Atmospheres*, 112, 321-341, 2007.

611 Li, Z., Lau, W. K. M., Ramanathan, V., Wu, G., Ding, Y., Manoj, M. G., Liu, J., Qian, Y., Li, J., and Zhou, T.: Aerosol and monsoon  
612 climate interactions over Asia, *Reviews of Geophysics*, 54, 2016.



613 Liu, G., Li, J., Wu, D., and Xu, H.: Chemical composition and source apportionment of the ambient PM 2.5 in Hangzhou,  
614 China, *Particuology*, 18, 135-143, 2015.

615 Liu, J., Zheng, Y., Li, Z., Flynn, C., Welton, E. J., and Cribb, M.: Transport, vertical structure and radiative properties of dust  
616 events in southeast China determined from ground and space sensors, *Atmospheric Environment*, 45, 6469-6480,  
617 2011.

618 Liu, Q., He, Q., Fang, S., Ying, G., Ma, C., Chen, Y., Kang, Y., Hu, P., Hua, Z., and Yao, Y.: Vertical distribution of ambient aerosol  
619 extinctive properties during haze and haze-free periods based on the Micro-Pulse Lidar observation in Shanghai,  
620 *Science of the Total Environment*, 574, 1502-1511, 2016.

621 Liu, S. Y., and Liang, X. Z.: Observed diurnal cycle climatology of planetary boundary layer height, *Journal of Climate*, 23,  
622 5790-5809, 2010.

623 Martins, J. V., Artaxo, P., Liousse, C., Reid, J. S., Hobbs, P. V., and Kaufman, Y. J.: Effects of black carbon content, particle size,  
624 and mixing on light absorption by aerosols from biomass burning in Brazil, *Journal of Geophysical Research*  
625 *Atmospheres*, 103, 32041-32050, 1998.

626 Medeiros, B., Hall, A., and Stevens, B.: What Controls the Mean Depth of the PBL?, *Journal of Climate*, 18, 3157-3172, 2005.

627 Ming, L., Jin, L., Li, J., Fu, P., Yang, W., Liu, D., Zhang, G., Wang, Z., and Li, X.: PM2.5 in the Yangtze River Delta, China:  
628 Chemical compositions, seasonal variations, and regional pollution events, *Environmental Pollution*, 223, 200, 2017.

629 Ngan, F., Stein, A., and Draxler, R.: Inline Coupling of WRF-HYSPLIT: Model Development and Evaluation Using Tracer  
630 Experiments, *Journal of Applied Meteorology & Climatology*, 54, 150330095210006, 2015.

631 Omar, A. H., Winker, D. M., Vaughan, M. A., Hu, Y., Trepte, C. R., Ferrare, R. A., Lee, K.-P., Hostetler, C. A., Kittaka, C., and  
632 Rogers, R. R.: The CALIPSO automated aerosol classification and lidar ratio selection algorithm, *Journal of Atmospheric*  
633 *and Oceanic Technology*, 26, 1994-2014, 2009.

634 Pan, L., Che, H., Geng, F., Xia, X., Wang, Y., Zhu, C., Chen, M., Gao, W., and Guo, J.: Aerosol optical properties based on  
635 ground measurements over the Chinese Yangtze Delta Region, *Atmospheric Environment*, 44, 2587-2596, 2010.

636 Petäjä, T., Järvi, L., Kerminen, V. M., Ding, A. J., Sun, J. N., Nie, W., Kujansuu, J., Virkkula, A., Yang, X., and Fu, C. B.: Enhanced  
637 air pollution via aerosol-boundary layer feedback in China, *Scientific Reports*, 6, 18998, 2016.

638 Pilat, M. J., and Charlson, R. J.: Theoretical and optical studies of humidity effects on the size distribution of a hygroscopic  
639 aerosol, *J. Rech. Atmos*, 2, 166-170, 1966.

640 Polissar, A. V., Hopke, P. K., Paatero, P., Kaufmann, Y. J., Hall, D. K., Bodhaine, B. A., Dutton, E. G., and Harris, J. M.: The  
641 aerosol at Barrow, Alaska: long-term trends and source locations, *Atmospheric Environment*, 33, 2441-2458, 1999.

642 Qi, B.: Seasonal Variation of Aerosol Optical Properties in an Urban Site of the Yangtze Delta Region of China, *Aerosol & Air*  
643 *Quality Research*, 16, 2016.

644 Sakai, T., Shibata, T., Iwasaka, Y., Nagai, T., Nakazato, M., Matsumura, T., Ichiki, A., Kim, Y. S., Tamura, K., and Troshkin, D.:  
645 Case study of Raman lidar measurements of Asian dust events in 2000 and 2001 at Nagoya and Tsukuba, Japan,  
646 *Atmospheric Environment*, 36, 5479-5489, 2002.

647 Sakai, T., Nagai, T., Nakazato, M., Mano, Y., and Matsumura, T.: Ice clouds and Asian dust studied with lidar measurements  
648 of particle extinction-to-backscatter ratio, particle depolarization, and water-vapor mixing ratio over Tsukuba, *Applied*  
649 *Optics*, 42, 7103-7116, 2003.

650 Seibert, P., Kromp-Kolb, H., Baltensperger, U., Jost, D. T., and Schwikowski, M.: Trajectory Analysis of High-Alpine Air  
651 Pollution Data, Springer US, 253-269 pp., 1994.

652 Sirois, A., and Bottenheim, J. W.: Use of backward trajectories to interpret the 5 - year record of PAN and O3 ambient air  
653 concentrations at Kejimikujik National Park, Nova Scotia, Journal of Geophysical Research Atmospheres, 100,  
654 2867-2882, 1995.

655 SiYu, C., JianPing, H., JingXin, L., Rui, J., NanXuan, J., LiTai, K., XiaoJun, M., and TingTing, X.: Comparison of dust emissions,  
656 transport, and deposition between the Taklimakan Desert and Gobi Desert from 2007 to 2011, SCIENCE CHINA Earth  
657 Sciences, 60, 1338, doi:<https://doi.org/10.1007/s11430-016-9051-0>, 2017.

658 Stocker, T. F., Qin, D., Plattner, G.-K., Tignor, M., Allen, S. K., Boschung, J., Nauels, A., Xia, Y., Bex, B., and Midgley, B.: IPCC,  
659 2013: climate change 2013: the physical science basis. Contribution of working group I to the fifth assessment report  
660 of the intergovernmental panel on climate change, in, Cambridge University Press, 2013.

661 Sun, T., Che, H., Wu, J., Wang, H., Wang, Y., and Zhang, X.: The variation in visibility and its relationship with surface wind  
662 speed in China from 1960 to 2009, Theoretical & Applied Climatology, 1-13, 2016.

663 Tang, G., Zhang, J., Zhu, X., Song, T., Munkel, C., Hu, B., Schäfer, K., Liu, Z., Zhang, J., and Wang, L.: Mixing layer height and its  
664 implications for air pollution over Beijing, China, Atmospheric Chemistry & Physics, 16, 2459-2475, 2016.

665 Tao, M., Chen, L., Su, L., and Tao, J.: Satellite observation of regional haze pollution over the North China Plain, Journal of  
666 Geophysical Research: Atmospheres, 117, 12203, 2012.

667 Tao, M., Chen, L., Wang, Z., Ma, P., Tao, J., and Jia, S.: A study of urban pollution and haze clouds over northern China during  
668 the dusty season based on satellite and surface observations, Atmospheric Environment, 82, 183-192, 2014.

669 Tao, M., Chen, L., Li, R., Wang, L., Wang, J., Wang, Z., Tang, G., and Tao, J.: Spatial oscillation of the particle pollution in  
670 eastern China during winter: Implications for regional air quality and climate, Atmospheric Environment, 144, 100-110,  
671 2016.

672 Uno, I., Eguchi, K., Yumimoto, K., Takemura, T., Shimizu, A., Uematsu, M., Liu, Z., Wang, Z., Hara, Y., and Sugimoto, N.: Asian  
673 dust transported one full circuit around the globe, 2, 2009.

674 Vaughan, M., Young, S., Winker, D., Powell, K., Omar, A., Liu, Z., Hu, Y., and Hostetler, C.: Fully automated analysis of  
675 space-based lidar data: An overview of the CALIPSO retrieval algorithms and data products, Proc. of SPIE Vol, 2004, 17.

676 Wang, S. X., and Zhang, C. Y.: Spatial and temporal distribution of air pollutant emissions from open burning of crop  
677 residues in China, Sciencepaper Online, 2008.

678 Wang, Y., Zhuang, G., Zhang, X., Huang, K., Xu, C., Tang, A., Chen, J., and An, Z.: The ion chemistry, seasonal cycle, and  
679 sources of PM 2.5 and TSP aerosol in Shanghai, Atmospheric Environment, 40, 2935-2952, 2006a.

680 Wang, Y. Q., Zhang, X. Y., and Arimoto, R.: The contribution from distant dust sources to the atmospheric particulate matter  
681 loadings at XiAn, China during spring, Science of the Total Environment, 368, 875, 2006b.

682 Winker, D. M., Vaughan, M. A., Omar, A., Hu, Y., Powell, K. A., Liu, Z., Hunt, W. H., and Young, S. A.: Overview of the CALIPSO  
683 mission and CALIOP data processing algorithms, Journal of Atmospheric and Oceanic Technology, 26, 2310-2323, 2009.

684 Wu, J., Fu, C., Zhang, L., and Tang, J.: Trends of visibility on sunny days in China in the recent 50 years, Atmospheric  
685 Environment, 55, 339-346, 2012.

686 Wu, Y., Han, Y., Voulgarakis, A., Wang, T., Li, M., Wang, Y., Xie, M., Zhuang, B., and Li, S.: An agricultural biomass burning

687 episode in eastern China: Transport, optical properties, and impacts on regional air quality, *Journal of Geophysical*  
688 *Research Atmospheres*, 122, 2017.

689 Xia, X., Li, Z., Holben, B., Wang, P., Eck, T., Chen, H., Cribb, M., and Zhao, Y.: Aerosol optical properties and radiative effects  
690 in the Yangtze Delta region of China, *Journal of Geophysical Research Atmospheres*, 112, 449-456, 2007.

691 Xia, X., Chen, H., Goloub, P., Zong, X., Zhang, W., and Wang, P.: Climatological aspects of aerosol optical properties in North  
692 China Plain based on ground and satellite remote-sensing data, *Journal of Quantitative Spectroscopy & Radiative*  
693 *Transfer*, 127, 12-23, 2013.

694 Xiao, Z.-m., Zhang, Y.-f., Hong, S.-m., Bi, X.-h., Jiao, L., Feng, Y.-c., and Wang, Y.-q.: Estimation of the main factors influencing  
695 haze, based on a long-term monitoring campaign in Hangzhou, China, *Aerosol and Air Quality Research*, 11, 873-882,  
696 2011.

697 Xin, Y.: Identification of Long-Range Transport Pathways and Potential Sources of PM<sub>10</sub> in Tibetan Plateau Uplift Area: Case  
698 Study of Xining, China in 2014, *Aerosol & Air Quality Research*, 16, 1044-1054, 2016.

699 Xing, C., Liu, C., Wang, S., Chan, K. L., Gao, Y., Huang, X., Su, W., Zhang, C., Dong, Y., and Fan, G.: Observations of the  
700 summertime atmospheric pollutants vertical distributions and the corresponding ozone production in Shanghai, China,  
701 *Atmospheric Chemistry & Physics*, 1-31, 2017.

702 Yong, H., Wu, Y., Wang, T., Xie, C., Zhao, K., Zhuang, B., and Li, S.: Characterizing a persistent Asian dust transport event:  
703 optical properties and impact on air quality through the ground-based and satellite measurements over Nanjing, China,  
704 *Atmospheric Environment*, 115, 304-316, 2015.

705 Zhang, J., Wang, L., Chen, J., Feng, S., Shen, J., and Jiao, L.: Hygroscopicity of ambient submicron particles in urban  
706 Hangzhou, China, *Frontiers of Environmental Science & Engineering*, 5, 342-347, 2011.

707 Zhang, J., and Li, X.: Vertical distribution of sand-dust aerosols and the relationships with atmospheric environment, *Journal*  
708 *of Arid Land*, 4, 357-368, 2012.

709 Zhang, R., Jing, J., Tao, J., and Hsu, S. C.: Chemical characterization and source apportionment of PM<sub>2.5</sub> in Beijing: seasonal  
710 perspective, *Atmospheric Chemistry & Physics Discussions*, 13, 7053-7074, 2013.

711 Zhang, X. Y., Arimoto, R., Zhu, G. H., Chen, T., and Zhang, G. Y.: Concentration, size - distribution and deposition of mineral  
712 aerosol over Chinese desert regions, *Tellus Series B-chemical & Physical Meteorology*, 50, 317-330, 1998.

713 Zhang, X. Y., Wang, Y. Q., Niu, T., Zhang, X. C., Gong, S. L., Zhang, Y. M., and Sun, J. Y.: Corrigendum to "Atmospheric aerosol  
714 compositions in China: spatial/temporal variability, chemical signature, regional haze distribution and comparisons  
715 with global aerosols " published in *Atmos. Chem. Phys.*, 12, 779–799, 2012, *Atmospheric Chemistry & Physics*, 11,  
716 26571-26615, 2012.

717 Zhang, Z., Zhou, W., Wenig, M., and Yang, L.: Impact of long-range desert dust transport on coastal East Asia: analysis of  
718 urban dust concentration and wet deposition with model simulation, *Air Quality Atmosphere & Health*, 1-13, 2016.

719 Zhu, J., Che, H., Xia, X., Chen, H., Goloub, P., and Zhang, W.: Column-integrated aerosol optical and physical properties at a  
720 regional background atmosphere in North China Plain, *Atmospheric Environment*, 84, 54-64, 2014.

721 Zhuang, B. L., Wang, T. J., Liu, J., Ma, Y., Yin, C. Q., Li, S., Xie, M., Han, Y., Zhu, J. L., and Yang, X. Q.: Absorption coefficient of  
722 urban aerosol in Nanjing, west Yangtze River Delta of China, *Atmospheric Chemistry & Physics*, 15, 16175-16213, 2015.

723

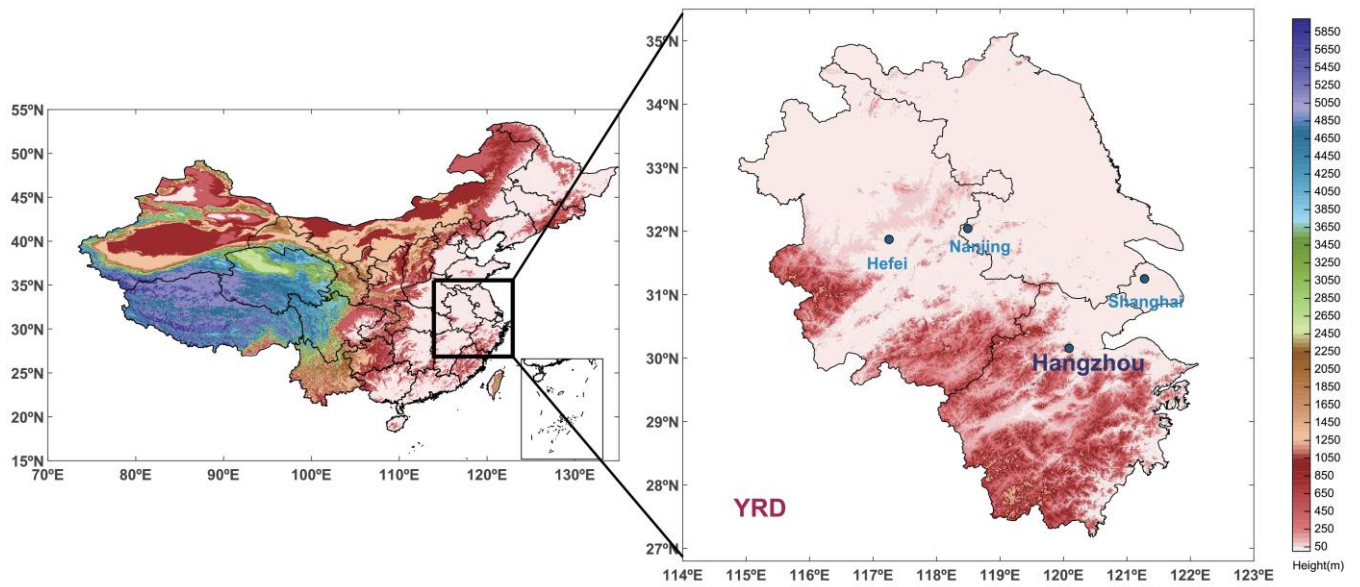

724

725

726 **Figure 1. Terrain elevation and location of the Yangtze River Delta region in China.**

727

728

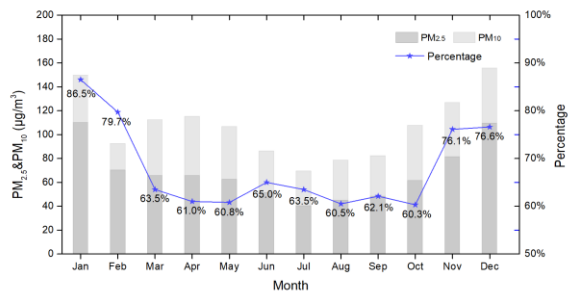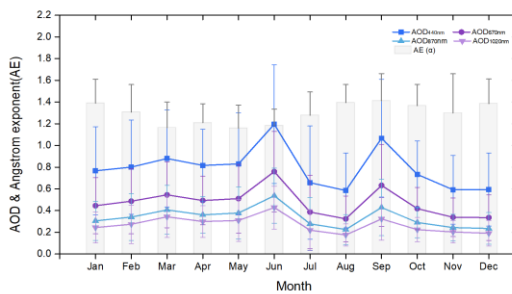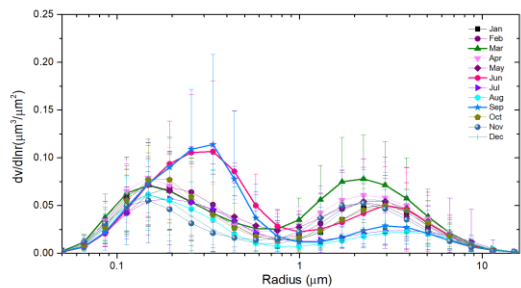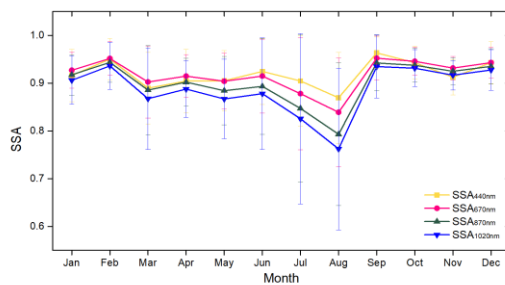

729

730 **Figure 2. Monthly variation in averaged (a) mass concentration of PM<sub>2.5</sub> and PM<sub>10</sub>, (b) AOD (440, 670, 870, and 1020 nm) and AE**

731 **(between 440 and 870 nm), (c) volume size distribution, (d) SSA (440, 670, 870, and 1020 nm), during 2013–2015 in Hangzhou.**

732

733

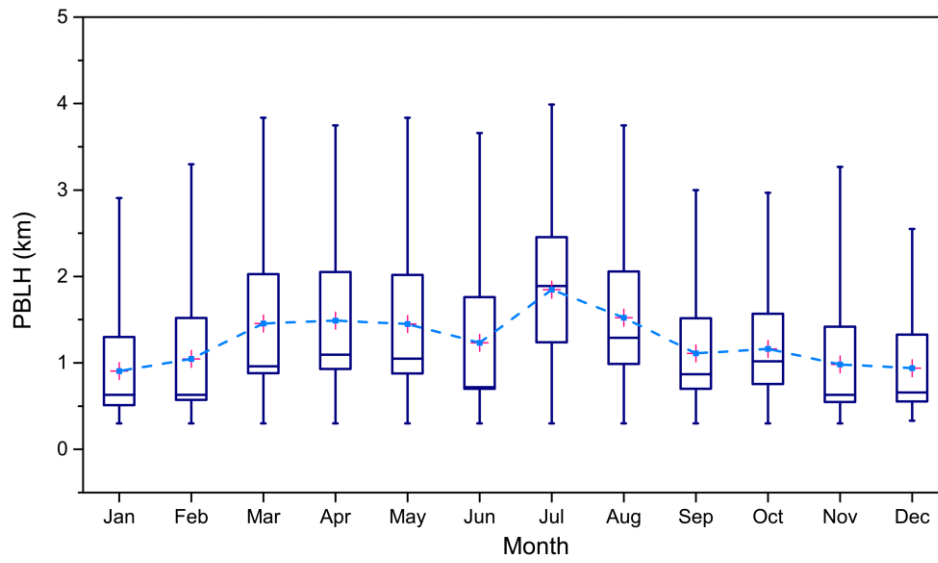

734

735 **Figure 3. Monthly variation of averaged PBLH retrieved from the MPL, and their 5th and 95th percentile box plots during 2013–**

736 **2015 in Hangzhou.**

737

738

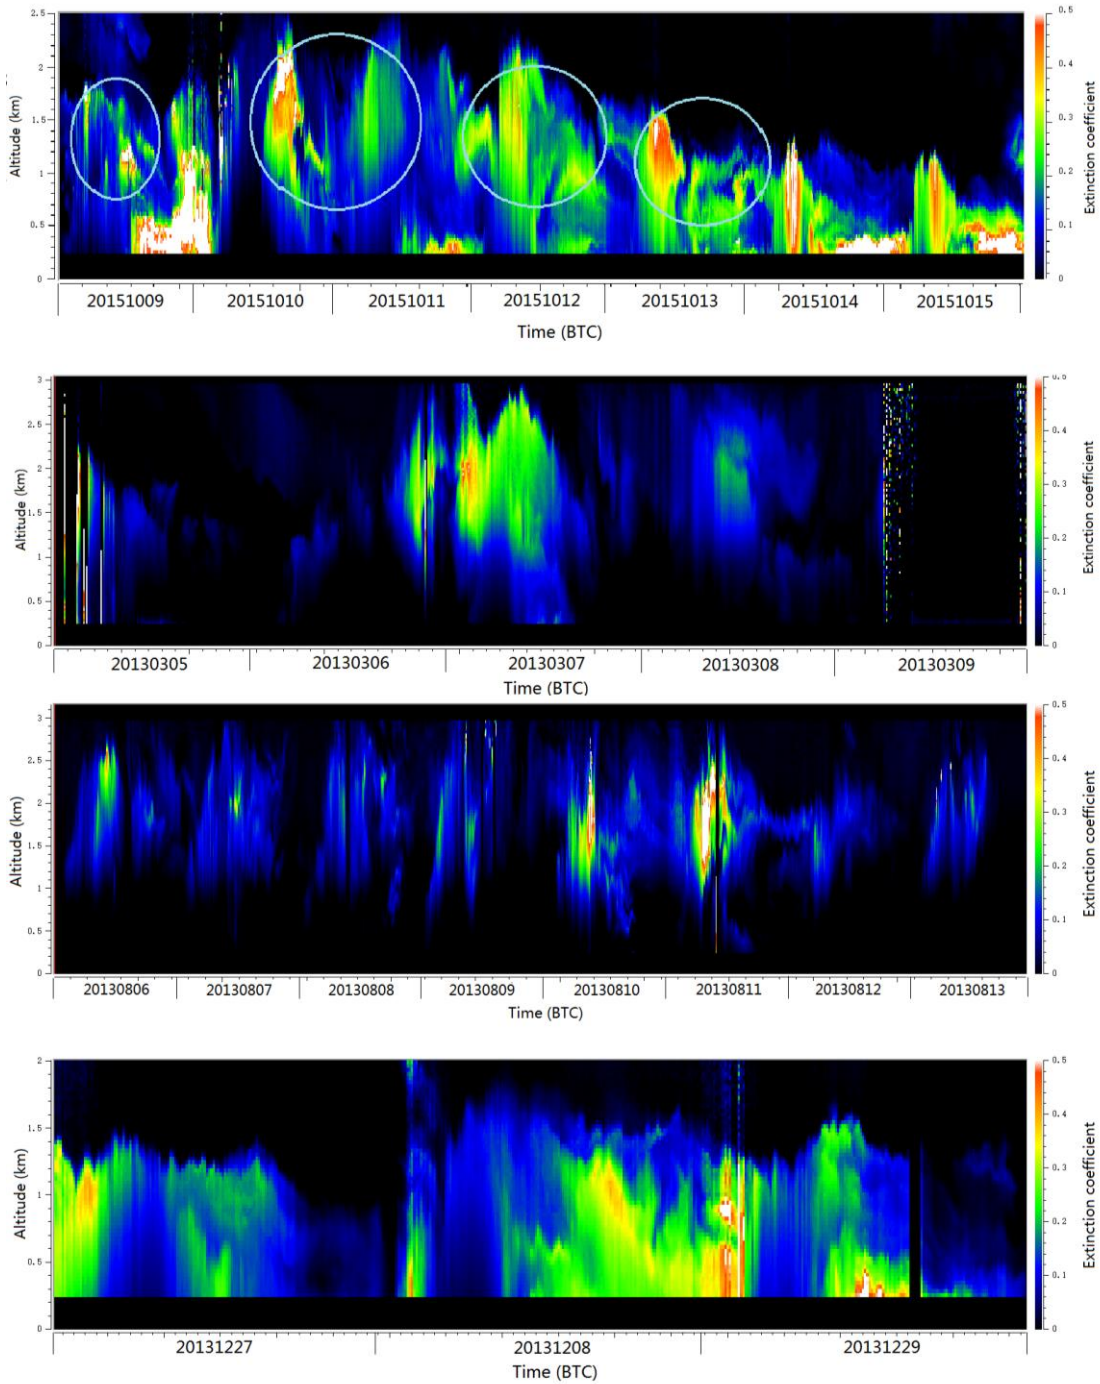

739

740

741

**Figure 4.** Time–height cross section of the ground-based lidar-derived extinction coefficient at 532 nm in Hangzhou during (a) 9–15 October 2015, (b) 5–9 March 2013, (c) 6–13 August 2013, and (d) 27–29 December 2013.

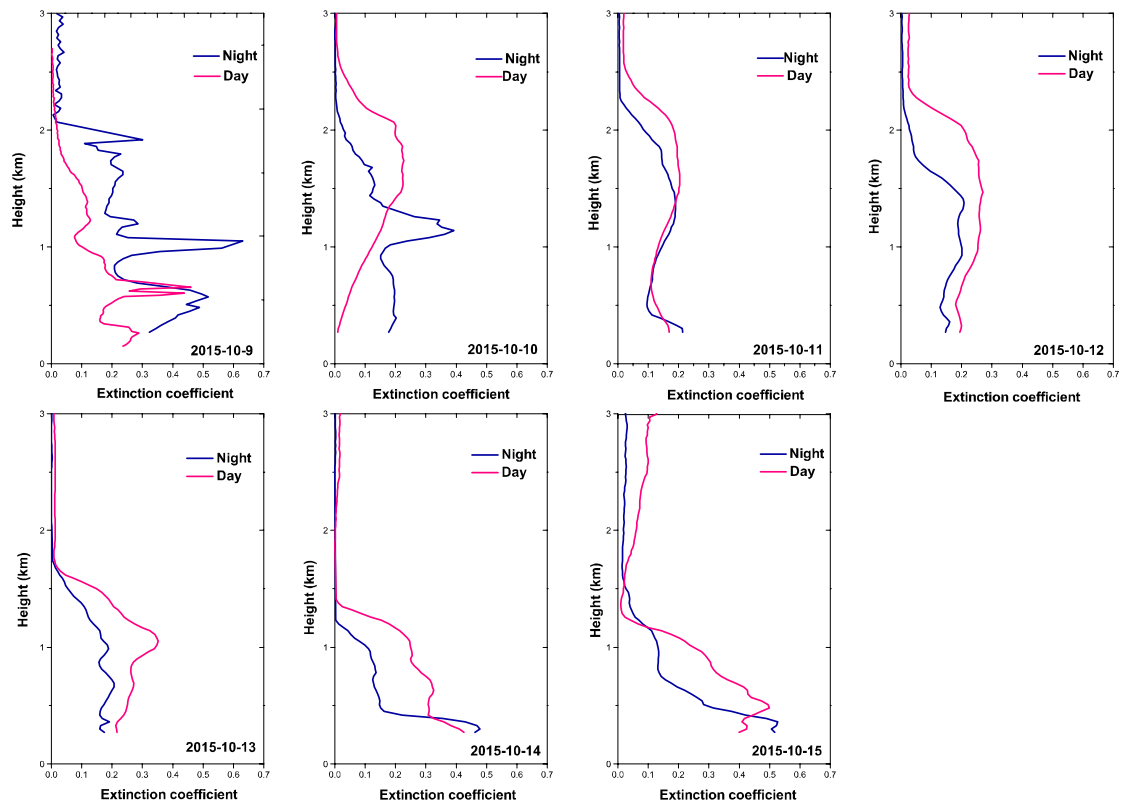

742  
 743  
 744  
 745  
 746  
 747  
 748

**Figure 5. Profiles of the aerosol extinction coefficient from MPL-retrieved data, averaged for daytime and nighttime during 9–15 October 2015 in Hangzhou.**



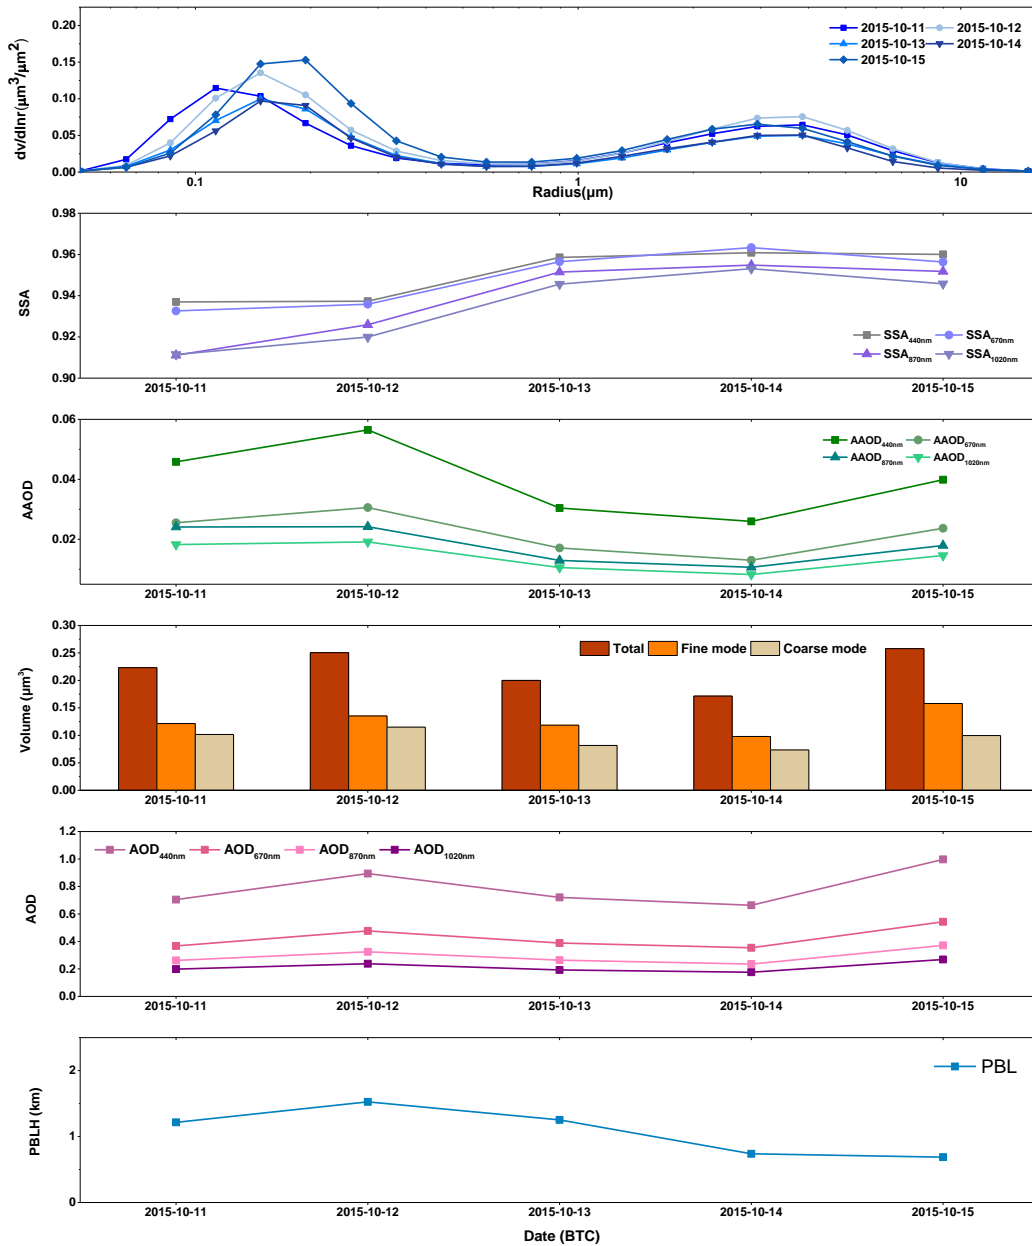

749

750 **Figure 6. Daily averaged variation in aerosol optical properties and PBLH in Hangzhou during 11–15 October 2015.**

751

752

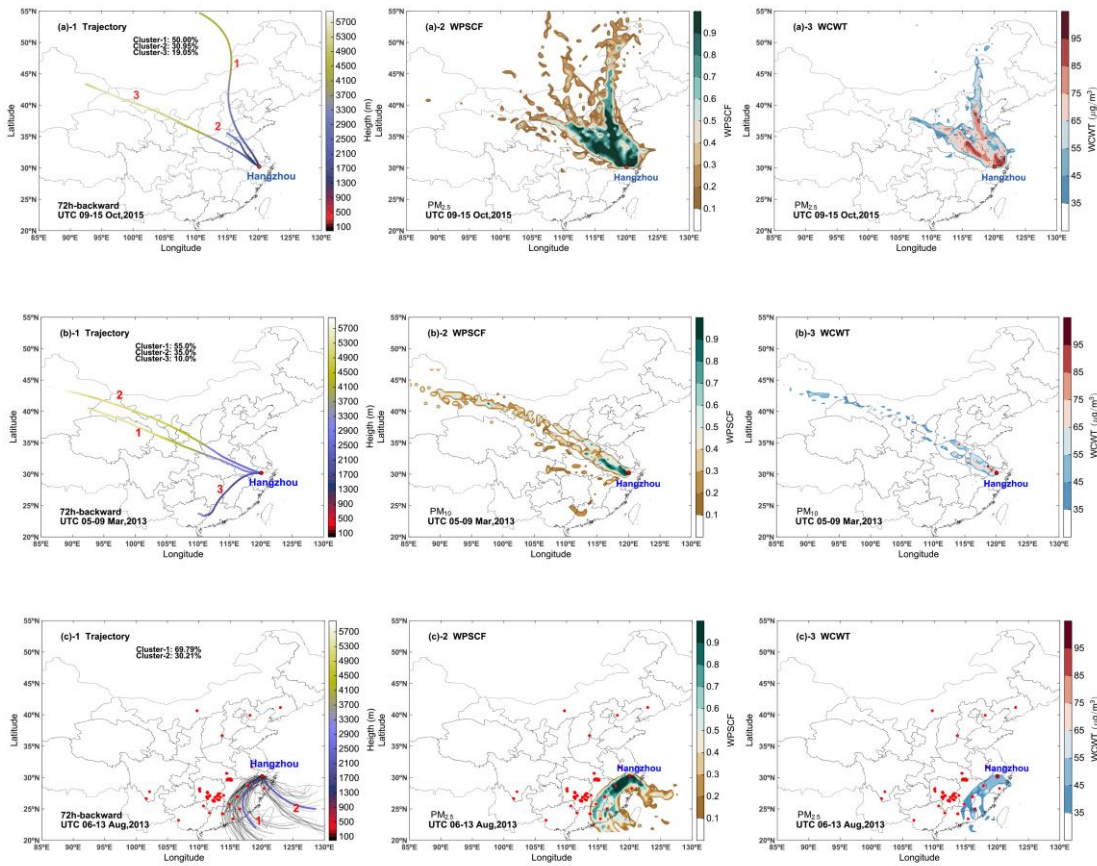

753

754

**Figure 7. Mean 72-h backward trajectories of each trajectory cluster and spatial distributions of WPSCF and WCWT values for**

755

**PM<sub>2.5</sub> in Hangzhou during (a) 9–15 October 2015, (b) 5–9 March 2013, and (c) 6–13 August 2013.**

756

757

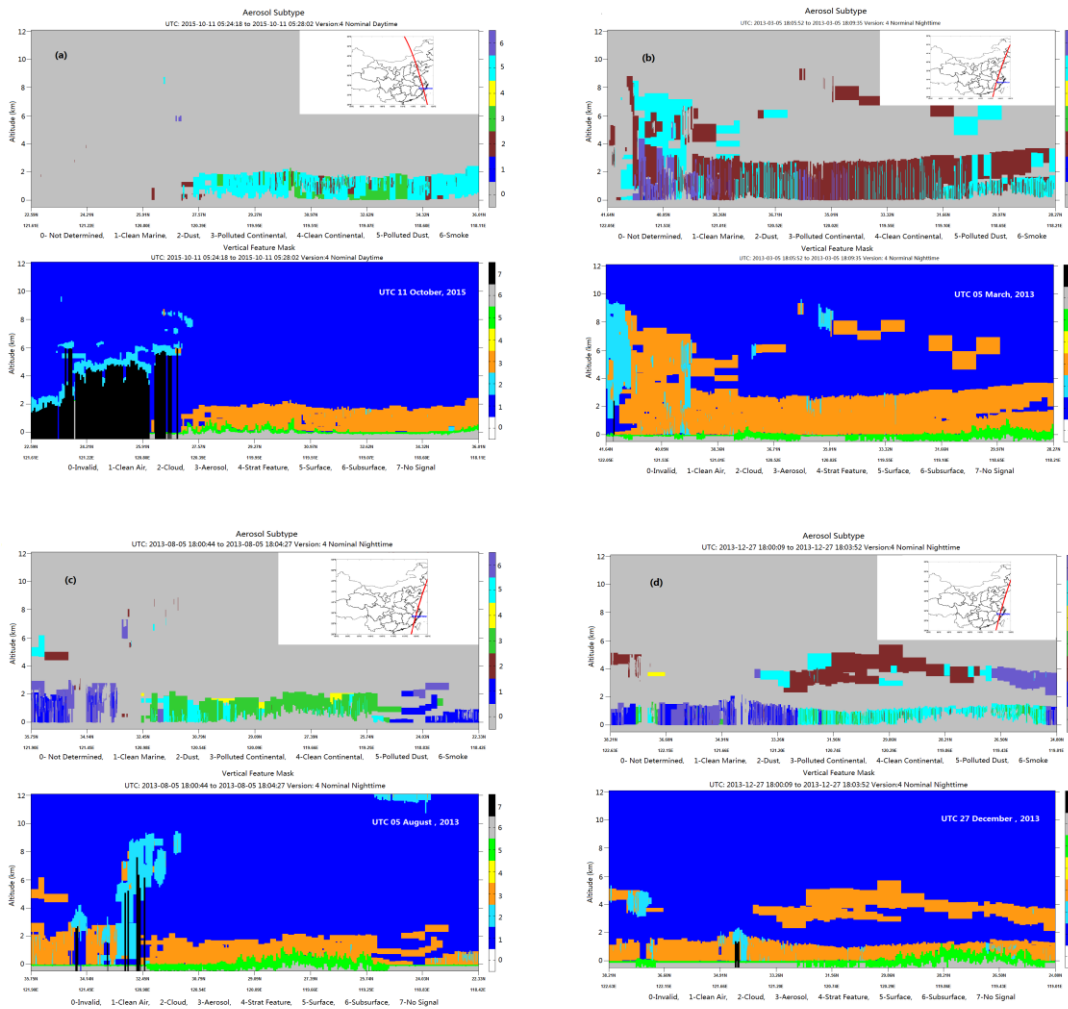

758

759

**Figure 8. CALIPSO L2 products of vertical feature mask, aerosol subtype, and its ground track on (a) 11 October 2015, (b) 5**

760

**March 2013, (c) 5 August 2013, and (d) 27 December 2013.**

761

762

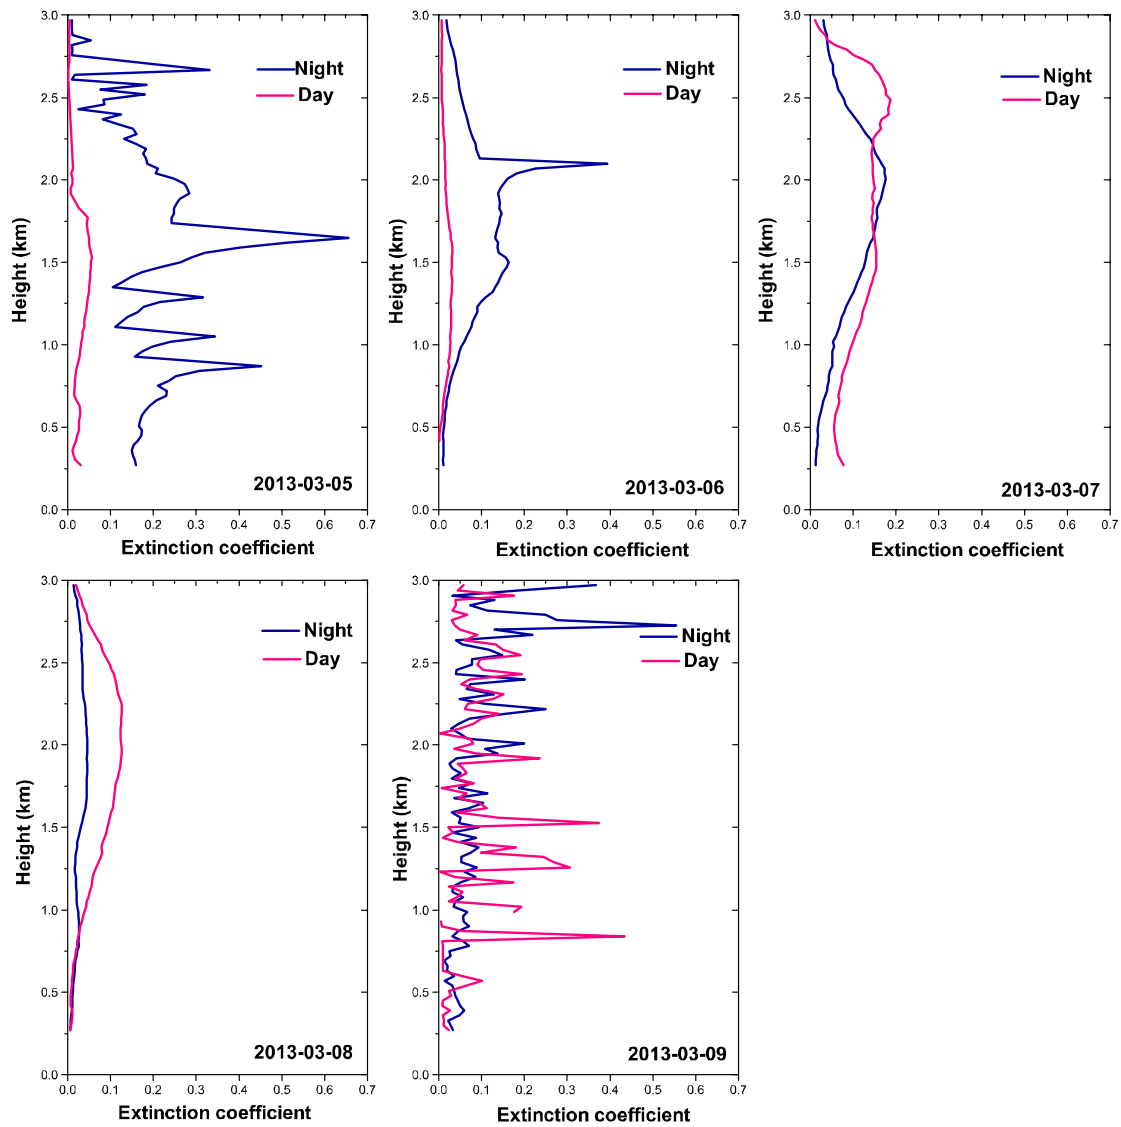

763  
 764  
 765  
 766  
 767

**Figure 9. Profiles of aerosol extinction coefficient from MPL-retrieved data averaged for daytime and nighttime during 5–9 March 2013 in Hangzhou.**

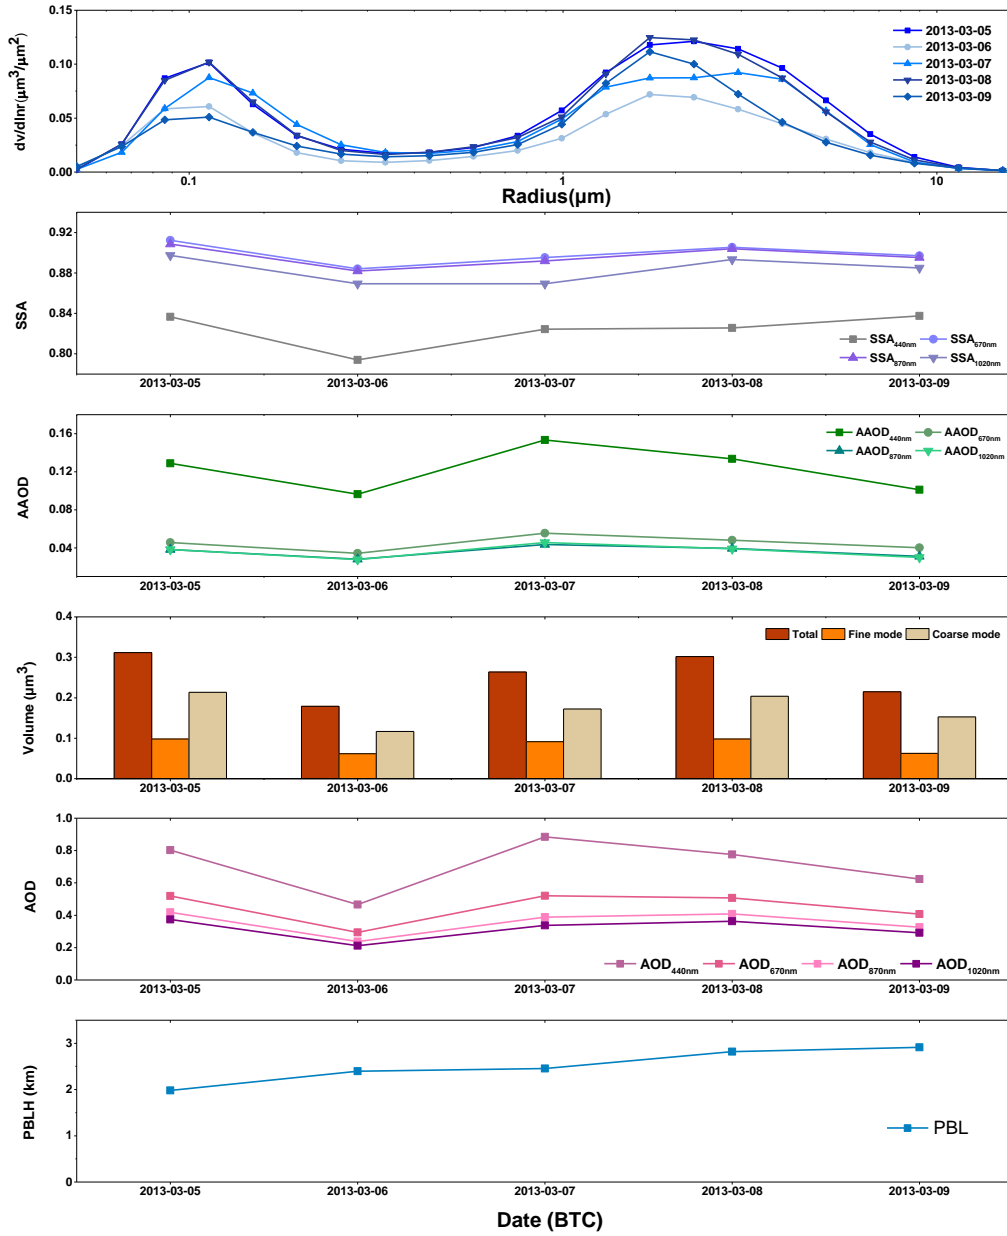

768

769 **Figure 10. Daily averaged variation in aerosol optical properties and the PBLH in Hangzhou during 5–9 March 2013.**

770

771

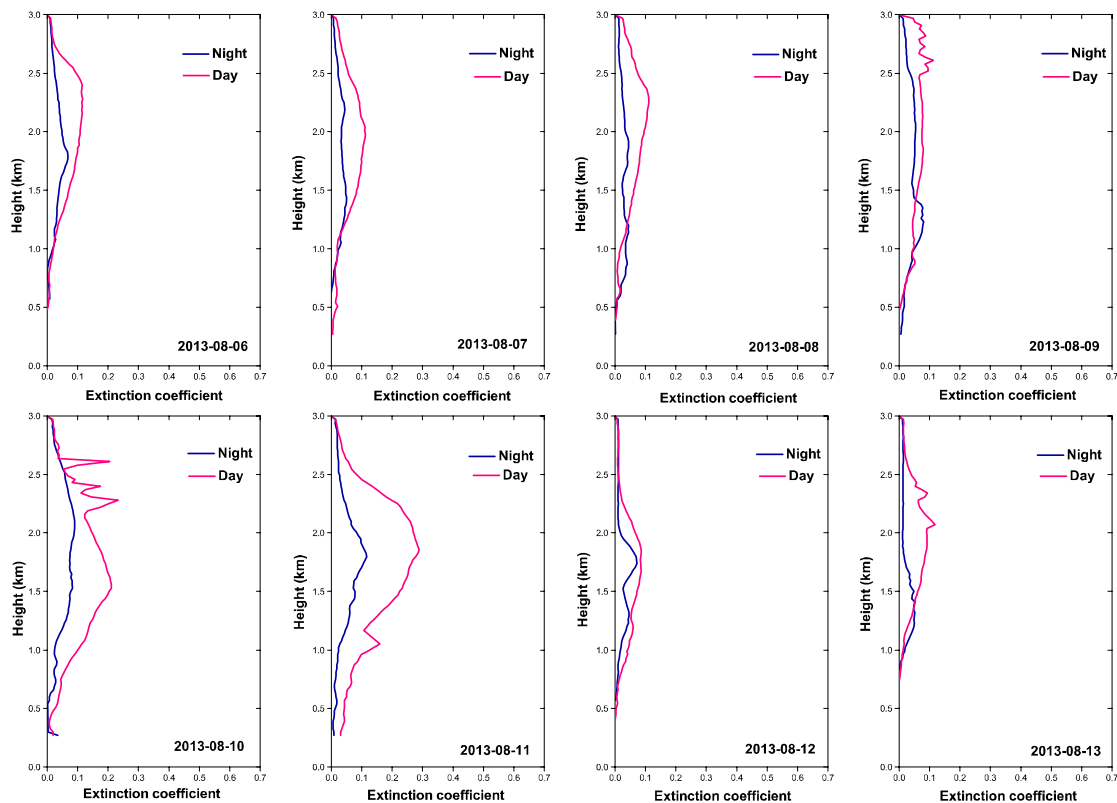

772

773

774

**Figure 11. Profiles of the aerosol extinction coefficient from MPL-retrieved data averaged for daytime and nighttime during 6–13**

775

**August 2013 in Hangzhou.**

776

777

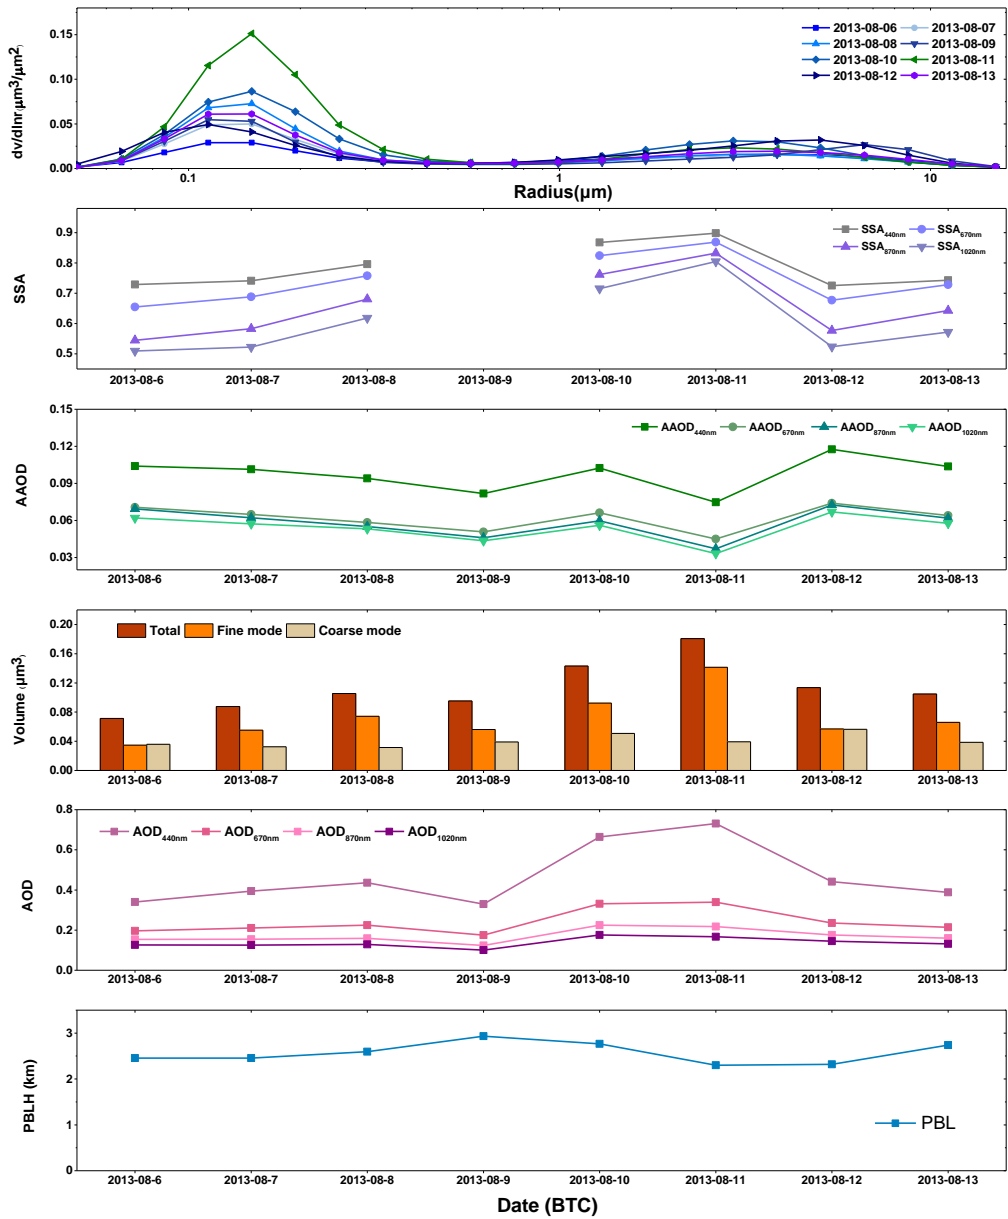

778

779 **Figure 12. Daily averaged variation of aerosol optical properties and PBLHs in Hangzhou during 6–13 August 2013.**

780

781

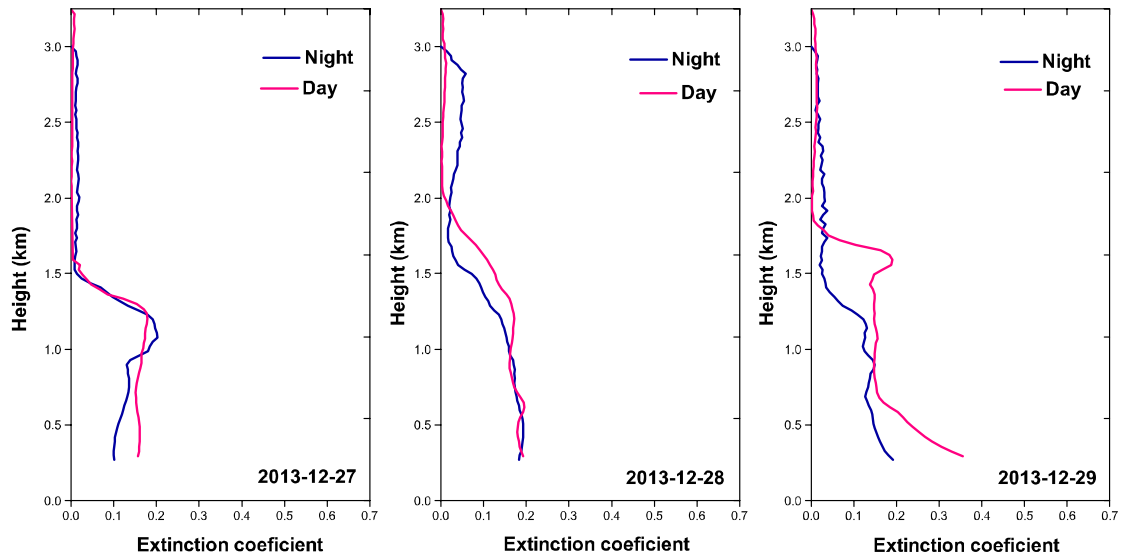

782

783

784 **Figure 13. Profiles of aerosol extinction coefficient from MPL-retrieved data averaged for daytime and nighttime during 27–29**

785 **December 2013 in Hangzhou.**

786

787



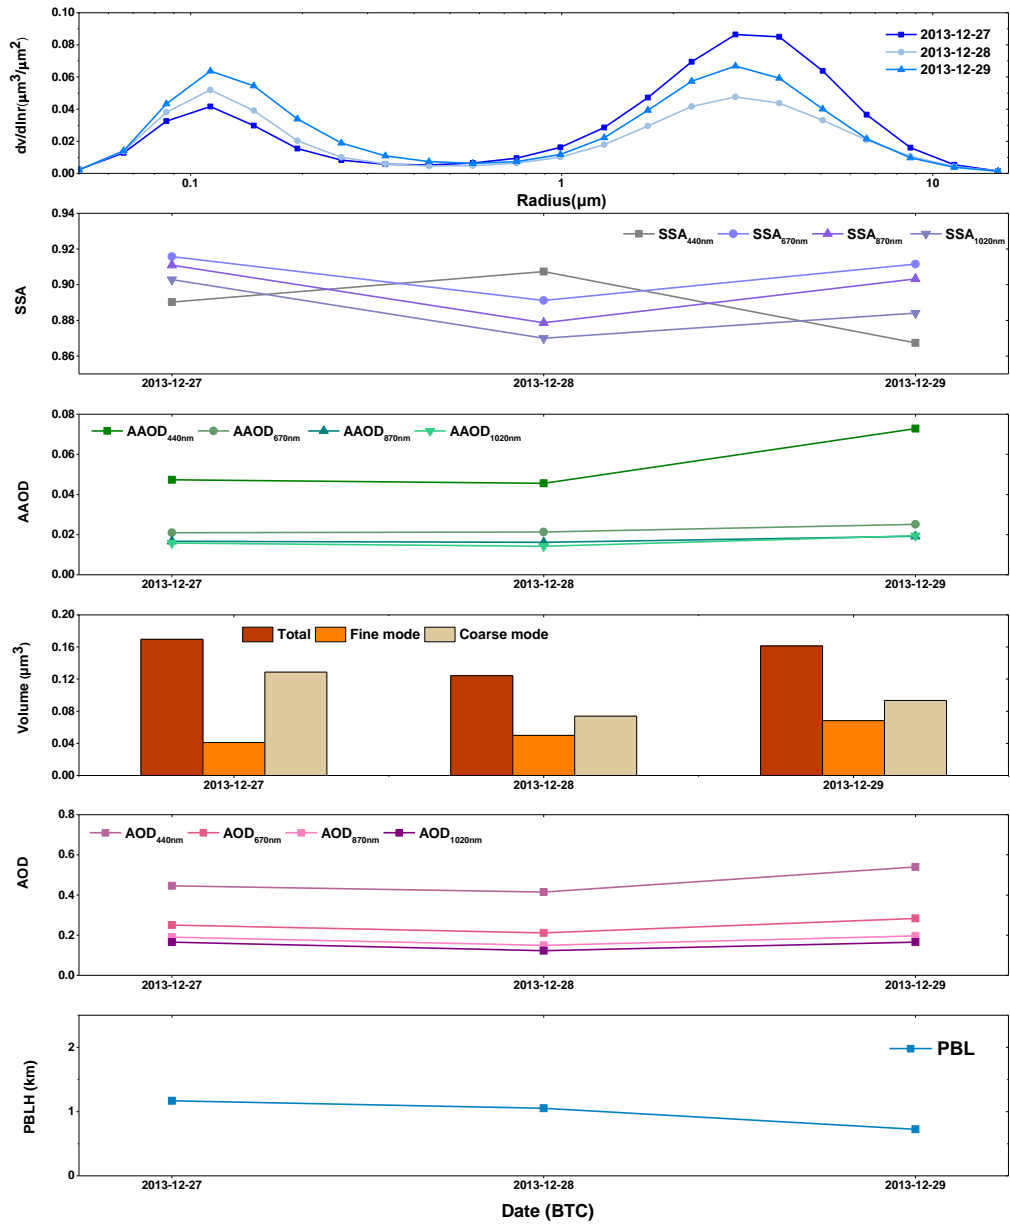

788

789 **Figure 14. Daily averaged variation in aerosol optical properties and the PBLH in Hangzhou during 27–29 December 2013.**

790

791

| <b>Case</b> | <b>Cluster</b> | <b>Number</b> | <b>Mean (<math>\mu\text{g}/\text{m}^3</math>)</b> |
|-------------|----------------|---------------|---------------------------------------------------|
| <b>1</b>    | 1              | 41            | 81.05±28.18                                       |
|             | 2              | 22            | 74.45±30.17                                       |
|             | 3              | 9             | 76.11±35.51                                       |
| <b>2</b>    | 1              | 12            | 71.08±60.00                                       |
|             | 2              | 7             | 84.57±18.26                                       |
| <b>3</b>    | 1              | 61            | 54.52±16.63                                       |
|             | 2              | 26            | 39.04±10.14                                       |

792

793 **Table 1. Trajectory number and PM mean concentration of each cluster in Hangzhou during three cases, including case 1**  
794 **(transportation from haze area of North China), case 2 (transportation from northwestern dust area), case 3(transportation from**  
795 **southern biomass burning area).**

796

797
